1 **Scx-positive tendon cells are required for correct muscle patterning**

2

3 Yudai Ono<sup>1</sup>, Tempei Sato<sup>2,3</sup>, Chisa Shukunami<sup>4</sup> Hiroshi Asahara<sup>3,5</sup>, Masafumi Inui<sup>1,2,6\*</sup>

4

5 1. Laboratory of Animal Regeneration Systemology, Department of Life Science, School  
6 of Agriculture, Meiji University, Kanagawa, 214-8571, Japan

7 2. Department of Systems BioMedicine, National Research Institute for Child Health and  
8 Development, Tokyo 157-8535, Japan

9 3. Department of Systems BioMedicine, Graduate School of Medical and Dental  
10 Sciences, Tokyo Medical and Dental University, Tokyo 113-8510, Japan

11 4. Department of Molecular Biology and Biochemistry, Graduate School of Biomedical  
12 and Health Sciences, Hiroshima University, Hiroshima, 734-8553, Japan.

13 5. Department of Molecular Medicine, The Scripps Research Institute, La Jolla, CA  
14 92037, USA

15 6. Meiji University International Institute for Bio-Resource Research, Kanagawa,  
16 214-8571, Japan

17

18

19 \* Correspondence: [inui\\_m@meiji.ac.jp](mailto:inui_m@meiji.ac.jp)

20

21 **Summary**

22

23 The elaborate movement of the vertebrate body is supported by the precise connection of  
24 muscle, tendon and bone. Each of the >600 distinct skeletal muscles in the human body  
25 has unique attachment sites; however, the mechanism through which muscles are  
26 reproducibly attached to designated partner tendons during embryonic development is  
27 incompletely understood. We herein show that Screlaxis-positive tendon cells have an  
28 essential role in correct muscle attachment in mouse embryos. Specific ablation of  
29 Screlaxis-positive cells resulted in dislocation of muscle attachment sites and abnormal  
30 muscle bundle morphology. Step-by-step observation of myogenic cell lineage revealed  
31 that post-fusion myofibers, but not migrating myoblasts, require tendon cells for their  
32 morphology. Furthermore, muscles could change their attachment site, even after the  
33 formation of the insertion. Our study demonstrated an essential role of tendon cells in the  
34 reproducibility and plasticity of skeletal muscle patterning, in turn revealing a novel  
35 tissue-tissue interaction in musculoskeletal morphogenesis.

36

37 Keywords: skeletal muscle, tendon, insertion, MTJ, limb, deltoid, gluteus, pectoralis,

38 Scx,

39

40 Graphical abstract

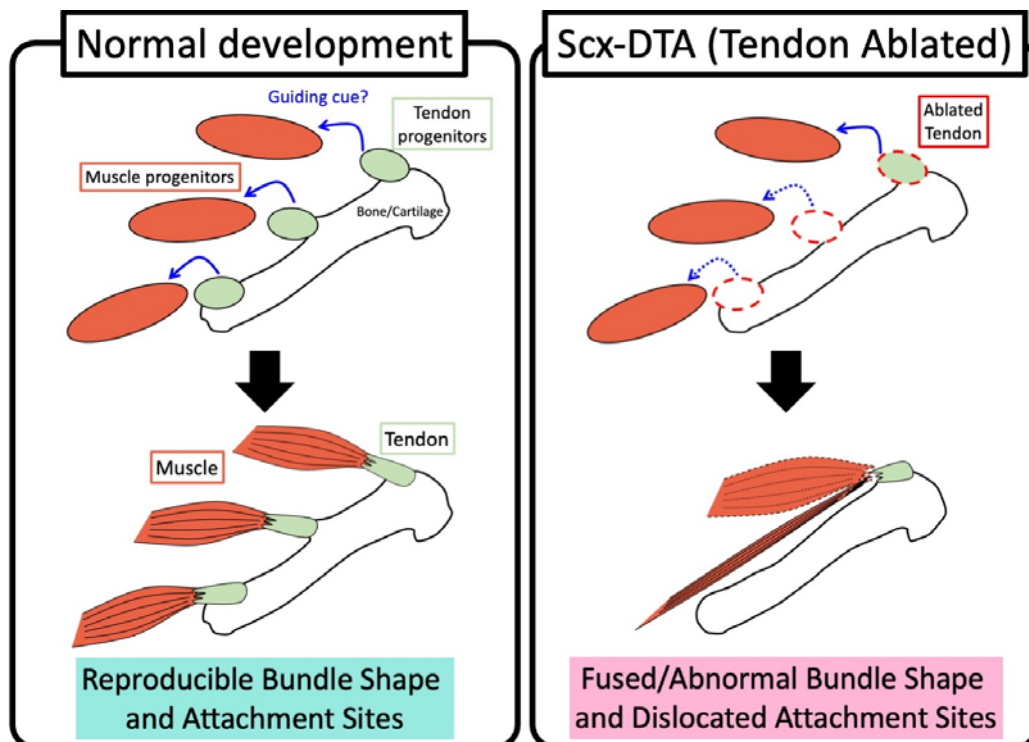

41

42

## 43 **Introduction**

44 The musculoskeletal system is a complex multi-tissue system that consists of muscle,  
45 tendon and bone, as well as associating connective tissues. Elaborate body movements of  
46 vertebrate are supported by the precise shape, position and functional connections of  
47 these components. While the differentiation process of each component has been well  
48 studied (Asahara, Inui, & Lotz, 2017; Buckingham & Rigby, 2014; Kozhemyakina,  
49 Lassar, & Zelzer, 2015), their tissue integration process remain largely unexplored.  
50 Hundreds of skeletal muscles exist in the mammalian body; however, most are derived  
51 from the somites. Myogenic progenitor cells migrate long distances to destinations such  
52 as the limbs, form a precise bundle shape, and attach with appropriate tendons and bones  
53 during embryonic development (Buckingham et al., 2003; Comai & Tajbakhsh, 2014). It  
54 is well known that the migration of myogenic progenitor cells from somite to limb bud is  
55 guided by secreted cues such as HGF/SF or SDF-1 (Dietrich et al., 1999; Griffin, Apponi,  
56 Long, & Pavlath, 2010). However, mechanisms that regulate tissue integration between  
57 post-migration muscle cells and tendons and bones are not fully understood (Kardon,  
58 2011; Schweitzer, Zelzer, & Volk, 2010). Considering the distinct cellular origin (i.e.,

59 muscles from the somites and tendons from the lateral plate) and large number of  
60 integrations to be formed in limited time and space, it is reasonable to assume that the  
61 local tissue-tissue interactions take place between myogenic progenitor cells and the  
62 surrounding cell/tissue. Indeed, several factors, including transcription factors, ECM,  
63 muscle connective tissue cells (MCTs) are reported to regulate the patterning of  
64 post-migrating myogenic cells in vertebrate limbs (Besse et al., 2020; Hasson et al., 2010;  
65 Helmbacher & Stricker, 2020; Kardon, Harfe, & Tabin, 2003; Kutchuk et al., 2015;  
66 Rodriguez-Guzman, Montero, Santesteban, Gañan, Macias, & Hurle, 2007b; Swinehart,  
67 Schlientz, Quintanilla, Mortlock, & Wellik, 2013). However, whether tendon cells, the  
68 intrinsic partner of skeletal muscles, have any role in instructing the muscle shape and  
69 patterning in mammals is unclear. To examine the role of tendon cells in the regulation of  
70 muscle patterning, we took a simple approach of lineage-specific cell ablation and reduced  
71 the tendon cells in embryos. As a result, we found that muscle attachment patterns are  
72 significantly altered in the embryo with reduced tendon cells. Our results indicate that  
73 Scx-positive tendon cells have an important instructive role in spatially precise muscle  
74 attachment patterns, and are in turn essential for reproducible and robust musculoskeletal

75 morphogenesis.

76

77 **Results and Discussion**

78 **ScxCre mediated tendon ablation**

79 To induce tendon cell-specific cell death, we mated a *ScxCre-L* Tg mouse  
80 (Sugimoto, Takimoto, Hiraki, & Shukunami, 2013b) with a *Rosa26-LSL-DTA* mouse  
81 (Voehringer, Liang, & Locksley, 2008) (Fig. 1A). As a result, we observed  
82 TUNEL-positive cells in tendon tissue of the tail and limb of Cre+/DTA+ embryo at  
83 E15.5, but not in control embryos (Fig. 1C, E arrowheads, Fig. S1 A-D). H&E staining of  
84 consecutive sections showed tissue ablation in the tail tendon tissue of Cre+/DTA+  
85 embryo (Fig. 1B, D arrowheads). Cre and DTA dependent TUNEL-positive cells were  
86 observed as early as E12.5 in the forelimb, shoulder, intervertebral mesenchyme, or tail  
87 (Fig. S1 E-P). These results suggest that we could successfully induce cell death  
88 specifically in the tendon cells, from their early stage of differentiation. Hereafter, in this  
89 manuscript, we designate the mice with *ScxCre-L* Tg and *Rosa26-LSL-DTA* alleles as  
90 “*Scx-DTA*” mice.

91 Next, we examined the tendon tissue of *Scx-DTA* embryo with the *Mkx-Venus*  
92 knock-in allele (Ito et al., 2010). As shown in Fig. 1F and J, the long tendons in the

93 zeugopod were reduced in E17.5 *Scx-DTA* embryo. The limb sections showed that the  
94 flexor digitorum profundus (FDP) tendon (Fig. 1G, K) and flexor digitorum sublimis  
95 (FDS) tendon (Fig. 1H, L) in the autopod, extensor carpi radialis tendons, extensor  
96 digitorum communis (EDC) tendons, or the palmaris longus tendon (Fig. 1I, M) in the  
97 zeugopod were greatly reduced in *Scx-DTA* embryos. The reduction of tendon tissue in  
98 other parts of the body, such as the Achilles tendon (Fig. 1N, R) or tail tendon (Fig. 1O, S)  
99 was also apparent. Furthermore, ligamentous tissue, such as the cruciate and patella  
100 ligaments were diminished (Fig. 1P, T) and the outer annulus fibrosus of the  
101 intervertebral disc was also reduced (Fig. 1Q, U). In sum, these results illustrated that our  
102 approach reduced the tendon and ligament tissues from the developing embryo, albeit not  
103 completely. The reductions of tendon tissue have been reported in mice with the knockout  
104 of tendon transcription factors (TFs), such as *Scleraxis* (*Scx*), *Mohawk* (*Mkx*) or *Egr1*  
105 (Guerquin et al., 2013; Ito et al., 2010; Murchison et al., 2007). The degree of  
106 tendon/ligament reduction in *Scx-DTA* mice was as severe as or even more severe than  
107 those observed in these TF mutants. Namely, the cell death was observed as early as  
108 E12.5 in *Scx-DTA* embryo, which is earlier than the reported tendon reduction in TF



109 mutants. In addition, while the tendon reduction was seen mainly in the long tendons in  
110 TF mutants, most of tendon and ligament tissues were reduced in *Scx-DTA* embryos. The  
111 Incomplete loss of tendon tissue was probably due to the penetrance of Cre  
112 activity(Comai, Sambasivan, Gopalakrishnan, & Tajbakhsh, 2014), or continuous  
113 recruitment of *Scx*-positive tendon cells from limb mesenchyme population (Huang et al.,  
114 2019; Shwartz, Viukov, Krief, & Zelzer, 2016). As tendon cell death occurs in a period  
115 that overlaps the individuation of tendon from anlage (Huang et al., 2015), this could also  
116 have an impact on tendon patterning. Indeed, the numbers of FDS or EDC tendons were  
117 reduced and outline of each of the tendons were indistinct in the *Scx-DTA* embryo (Fig.  
118 1H, I, L, M)

119 We found that *Scx-DTA* pups died soon after birth (Fig. 1V, W). *Scx-DTA*  
120 embryo showed a defect in diaphragm (described below), which could cause an  
121 insufficient respiratory function in newborn *Scx-DTA* pups. In addition, as *Scx* is  
122 expressed also in non-tendon/ligament tissues such as the patella, rib cage, and bone  
123 ridges (Blitz, Sharir, Akiyama, & Zelzer, 2013; Sugimoto, Takimoto, Akiyama, Kist,  
124 Scherer, et al., 2013a), these *Scx*-positive skeletal elements are also reduced or lost in

125 *Scx-DTA* embryos (Fig. 1X, Fig. S2). The loss of rib cage could also cause respiratory  
126 problems. Thus, in the present study, we only focused on embryonic development. The  
127 effects of skeletal abnormality are also discussed (see below).

128

### 129 **Muscle patterning was altered in tendon-ablated embryos**

130           Next, we examined whether the patterning (i.e., shape or attachment) of  
131 skeletal muscles was altered in *Scx-DTA* embryos. First, we applied whole-mount  
132 immunohistochemistry with a myosin heavy chain (MHC) antibody for the analysis of  
133 the forelimb of P0 pups. In control limbs, the muscles were located between their regular  
134 attachment sites (origin and insertion); for example, the deltoid muscle originates from  
135 spine of the scapula and inserts into deltoid tuberosity (Fig. 2B, C blue arrowhead). In  
136 contrast, muscles in *Scx-DTA* mice showed changes in their attachment sites; for example,  
137 the insertion site of the deltoid muscle changed to the shoulder joint (Fig. 2F, G red  
138 arrowhead). The shapes/attachments of muscles in the zeugopod also changed, for  
139 example the extensor carpi ulnaris (ECU) and extensor digiti quarti/quinti (EDQ)  
140 muscles were clearly separated in the control limb (Fig. 2D arrowheads), but they were

141 fused into a single muscle bundle in the *Scx-DTA* limb (Fig. 2H arrowhead). The extensor  
142 pollicis muscles, which are normally covered by superficial muscles, became visible (Fig.  
143 2D, H arrows). Of note, despite their morphological change, most of the muscles in the  
144 zeugopod attached with tendons at their distal end.

145 In sections of E18.5 forelimbs, muscles in the metacarpal position were grossly normal  
146 (Fig. 2I, L, O). However, FDS muscles were found in the wrist position of the *Scx-DTA*  
147 limb, where muscle was not observed in control embryos (Fig. 2J, M, O). Conversely,  
148 FDS muscles were missing from their normal position in the zeugopod of *Scx-DTA* mice  
149 (Fig. 2K, N, O arrowheads). Interestingly, similar distal dislocation of FDS muscle has  
150 been reported in *Scx*-knockout mice (Huang et al., 2013), indicating that this change in  
151 muscle position is due to the reduction of FDS and FDP tendons. In addition, the  
152 arrangement of the extensor carpi (longus/Brevis) and FDP muscles was changed (Fig.  
153 2K, N arrows). On the other hand, muscles in the hindlimb generally showed a normal  
154 attachment pattern (Fig. S3).

155 Altered attachment sites were also observed in other muscles, especially in  
156 muscles connecting to the body trunk and limbs. For example, the pectoral muscles

157 originate from the sternum and insert into the deltoid tuberosity in control embryos (Fig.  
158 2P, P' arrowhead); however, the insertion sites of these muscles were distally dislocated  
159 toward the elbow joint in *Scx-DTA* mice (Fig. 2R, R' arrowhead). In a severe case, the  
160 pectoral minor muscle separated into two bundles (Fig. 2R, R' arrows). Similarly, in  
161 *Scx-DTA* mice, the insertion site of the gluteus maximus muscle, which normally  
162 originates from the ilium and inserts into the gluteus tuberosity (Fig. 2Q, Q' arrowheads)  
163 changed distally, toward the knee joint (Fig. 2S, S'). The organization of muscles in the  
164 trunk, such as the rectus abdominis, was also changed in *Scx-DTA* mice (Fig. 2T, V). In  
165 the diaphragm, the width of the central tendon was greatly reduced (Fig. 2U, W arrows)  
166 and the orientation of associated muscle fibers was changed (Fig. 2U, W arrowheads). In  
167 sum, the organization of skeletal muscles of many body parts was changed in *Scx-DTA*  
168 mice, suggesting that tendon cells are necessary for skeletal muscle to form a precise  
169 shape and attachment in the correct position. The role of tendon tissue in muscle  
170 patterning has been shown indirectly in other vertebrate species; for example, the surgical  
171 removal of the tendon primordia resulted in ectopic extension of the muscle into the knee  
172 joint in chicken embryos (Kardon, 1998). *Scx*-knockout zebrafish embryos showed

173 abnormal muscle patterning (Kague et al., 2019). In mammals, muscle-tendon interaction  
174 has been studied in the opposite direction and the requirement of muscle cells for tendon  
175 formation has been reported (Brent, Braun, & Tabin, 2005; Pryce et al., 2009). Our results  
176 represent the first evidence that directly points to the importance of tendon cells in muscle  
177 patterning in mammalian embryos. Muscle patterning in limbs also depends on  
178 LPM-derived mesenchyme cells or muscle connective tissue (MCT) cells that are closely  
179 associated with the myogenic lineage (Hasson et al., 2010; Kardon et al., 2003;  
180 Vallecillo-García et al., 2017). As such, we considered whether MCT is affected in  
181 *Scx-DTA* mice. As shown in Fig. S4, the expression levels of MCT marker genes were  
182 unaltered in *Scx-DTA* mice, while tendon marker genes were clearly reduced. Also, *Cre*  
183 expression in *ScxCre-L* Tg is restricted in tendon cells and not detected in MCTs  
184 (Sugimoto, Takimoto, Hiraki, & Shukunami, 2013b). We concluded that the phenotype  
185 seen in *Scx-DTA* mice is primarily due to the loss of tendon cells.

186

### 187 **Myofibers but not myoblasts require tendon cells for patterning**

188 Next, to elucidate the stage at which tendon-muscle interaction takes place, we

189 monitored the location and shape of the myogenic cell lineage in a step-by-step manner,  
190 along with their migration and differentiation. First, we found that *pax3*-positive  
191 myogenic progenitor cells were induced in the somite and migrated normally into the  
192 limb buds at E11.5 (Fig.3A, D arrowheads). *Myogenin*-positive myoblast positions were  
193 grossly normal at E12.5 or E13.5 (Fig.3B, C, E, F), suggesting that myoblast segregation  
194 occurred in similar manner in control and *Scx-DTA* mice. Furthermore, *myh3*-positive  
195 myofibers were observed in same position in *Scx-DTA* and control embryos at E12.5 (Fig.  
196 3G, J), indicating that myofiber differentiation is not dependent on tendon cells. Of note,  
197 we found that the *myh3* signal became significantly high at the distal/proximal ends of  
198 myofibers from E13.5 (Fig. 3H, I arrowheads). By comparing the expression of *myh3* and  
199 a mature tendon marker, *tenomodulin* (*Tnmd*) (Shukunami, Oshima, & Hiraki, 2001;  
200 Shukunami et al., 2018), we noted that this high *myh3* expression marks the boundary of  
201 muscle and tendon (Fig. S3). We therefore interpreted the *myh3* high region as surrogate  
202 of the muscle-tendon boundary. The shape of *myh3*-positive muscle bundles clearly  
203 differed between *Scx-DTA* and control embryos at E13.5 (Fig.3H, K). While the EDC  
204 muscle in the control embryo formed a sharp boundary at its distal tip (Fig. 3H), the distal

205 tip of EDC in *Scx-DTA* embryo remained loose shape without the clear boundary  
206 formation (Fig. 3K). Moreover, while the ECU and EDQ muscle bundles in control  
207 embryos were clearly separated and formed two distal boundaries (Fig. 3H blue  
208 arrowheads), those muscles did not separate or form normal distal boundaries in *Scx-DTA*  
209 embryos (Fig. 3K red arrowheads). The muscle patterning defects became more apparent  
210 in E14.5, where EDC/EDQ/ECU muscles could not be distinguished (Fig. 3I, L).  
211 Immunohistochemistry with MHC antibodies confirmed that the shapes of MHC-positive  
212 muscle bundles became loose in *Scx-DTA* embryos (Fig. 3M-P) and the insertion sites of  
213 several muscles, including the triceps (Fig. 3 M, O) and deltoid muscles (Fig. 3N, P),  
214 were dislocated. These results indicate that tendon cells are dispensable for the migration,  
215 initial segregation, or differentiation of myofibers, but are required for the formation of  
216 proper muscle bundle morphologies and the precise location of the attachment site.  
217 Previous studies showed that tendon anlagen are induced in muscles-less limbs normally;  
218 however the maturation of tendons requires muscles (Brent et al., 2005; Huang et al.,  
219 2015; Pryce et al., 2009). Our results together with those studies, indicate that muscle and  
220 tendon anlage are induced independently, but their connection and maturation is mutually

221 dependent. The patterning of limb muscle is regulated by surrounding tissues at various  
222 time point (Helmbacher & Stricker, 2020). While the loss of the *Tbx5* in *Prx1*-positive  
223 mesenchyme altered the patterning of tendon and muscle from E12.5 (Hasson et al.,  
224 2010), *Osr2Cre* dependent MCT ablation affected the patterning of *MyoD*-positive  
225 muscle clusters at E13.0 (Besse et al., 2020). Our results implied that the role of tendon  
226 cells, which is to finalize the muscle bundle position and attachment, is played later in  
227 comparison to other connective tissues. It is likely that multiple inputs from surrounding  
228 cells regulate limb muscle patterning sequentially and in an overlapping manner.

229

### 230 **Skeletal malformation or cell death are not the cause of muscle patterning defects**

231 As *Scx* is also expressed in some skeletal elements, such as the rib and patella  
232 (Sugimoto, Takimoto, Hiraki, & Shukunami, 2013b), *Scx-DTA* mice showed several  
233 skeletal malformations, including loss of the rib cage or deltoid tuberosity (Fig. 1X, Fig.  
234 S2). To exclude the possibility that these skeletal malformation caused the muscle  
235 patterning defects, we examined the attachment pattern in embryos in which skeletal  
236 defects similar to those of *Scx-DTA* mice were reported (Braun, Rudnicki, Arnold, &



237 Jaenisch, 1992; Kist et al., 2002). *Sox9* heterozygous (*Sox9<sup>fl/-</sup>*) embryos which lack the  
238 deltoid tuberosity were generated by mating *Sox9<sup>fllox/fllox</sup>* and *Meox2-Cre* mice (Fig. S6B,  
239 D). Heterozygous *Myf5<sup>Cre/+</sup>* knock-in mice were intercrossed to generate homozygous  
240 *Myf5<sup>Cre/Cre</sup>* embryos, which resulted in rib cage malformation due to the loss of the Myf5  
241 protein (Fig. S5F, H). In both cases the insertion sites of the pectoralis major muscles  
242 were not altered, despite the skeletal defects (Fig. S6 A, C, E, G). These results imply that  
243 the loss of skeletal elements is not the major cause of the muscle patterning defect seen in  
244 *Scx-DTA* mice. A previous study on the role of transcription factor *Lmx1b* also showed  
245 that the change of skeletal elements alone does not cause the muscle patterning change.  
246 Deletion of *Lmx1b* in a *Prx1*-positive lineage altered the dorso-ventral polarity of the  
247 whole limb, including the bone, tendon and muscle; however the loss of *Lmx1b* in the  
248 *Sox9*-positive lineage resulted in the change of bone, but not tendon or muscle polarity  
249 (Li, Qiu, Watson, Schweitzer, & Johnson, 2010).

250           Programmed cell death is one of the important driving forces of morphogenesis,  
251 such as digit formation or muscle belly segregation (Guha, Gomes, Kobayashi, Pestell, &  
252 Kessler, 2002; Rodriguez-Guzman, Montero, Santesteban, Gañan, Macias, & Hurler,

253 2007a). As such, the cell death induced in *Scx-DTA* mice could directly or indirectly  
254 affect the muscle attachment pattern. To explore this possibility, we examined the muscle  
255 patterning of the embryo where cell death is induced in muscle tissue by the *Myf5-Cre*  
256 dependent expression of DTA (*Myf5<sup>Cre/+</sup>:Rosa26-LSL-DTA*, hereafter “*Myf5-DTA*”). In  
257 *Myf5-DTA* embryos, despite a severe reduction of muscle mass, the remaining pectoralis  
258 major muscle was correctly inserted into the deltoid tuberosity (Fig. S6I, J). This result  
259 indicated that excess cell death in the tissue does not necessarily cause muscle patterning  
260 defects.

261

## 262 **Dynamic change in muscle patterning after myofiber formation**

263 The results shown above implied that the skeletal muscles define their  
264 attachment sites after myofiber formation (e.g., Fig. 3 G-L). We then asked if the position  
265 of muscle could be altered after the formation of insertion, which may provide skeletal  
266 muscle patterning further plasticity and robustness. To examine this point, we observed  
267 the position and insertion of gluteus maximus muscle at two time points E14.5 and E17.5.  
268 As shown in Fig. 4A and D, the distal tips of the gluteus maximus are located at the

269 middle of the femur (i.e., the gluteus tuberosity) at E14.5 in both WT and *Scx-DTA* mice  
270 (Fig. 4A, D). A detailed section analysis confirmed that the gluteus maximus muscles  
271 formed insertions with gluteus tuberosity through tendon cells at this stage, although the  
272 tendon cells were reduced in *Scx-DTA* mice (Fig. 4B, C, E, F). As embryonic  
273 development proceeds, the junction of the gluteus maximus muscle/tendon matured and  
274 was firmly inserted into the gluteus tuberosity at E17.5 (Fig. 4G-I). On the other hand, the  
275 tip of gluteus maximus muscle of *Scx-DTA* mice was distally dislocated while most of the  
276 tendon and insertion into the gluteus tuberosity was lost by this stage (Fig. 4J-L). These  
277 results imply that the skeletal muscle is able to reposition its attachment site according to  
278 environmental changes, even after myofiber differentiation or the formation of initial  
279 attachment. Recent studies also reported the post-natal elongation or post-fusion  
280 repositioning of muscles (Gu et al., 2016; Huang et al., 2013), indicating that the  
281 plasticity of muscle positioning is higher than generally considered. We assume that this  
282 interaction between skeletal muscle and tendon provides musculoskeletal morphogenesis  
283 reproducibility and robustness to resist environmental or genetic perturbations.

284 The molecular mechanism underlying this muscle-tendon interaction remains

285 to be explored. In *Scx-DTA* mice, muscles in the zeugopod (i.e., the EDC/EDQ/ECU  
286 muscles) fused and attached to the remaining tendons at their distal end (Fig. 2H). The  
287 insertion sites of the muscles in the girdle (i.e., the pectoral and gluteus muscles)  
288 dislocated toward the joint regions, such as the shoulder, elbow or knee (Fig. 2, Fig. S7B).  
289 The remaining tendon cells were relatively abundant in the joint area of *Scx-DTA*  
290 embryos (Fig. 1F, J, Fig. S7A), probably due to the initial amount and continuous cell  
291 recruitment/differentiation from the *Scx*-negative cell population (Huang et al., 2019;  
292 Shwartz et al., 2016). The fact that muscle did not attach randomly to nearby bone but  
293 changed its morphology toward the distal tendon tissue implied a hypothesis that  
294 diffusible molecule(s) secreted from tendon cells could attract myofibers. Indeed, recent  
295 studies reported the involvement of retinoic acid in the formation of the extraocular  
296 functional unit (Comai et al., 2020), and FGF or BMP signaling were active at the  
297 interface of the embryonic tendon and muscle (Eloy-Trinquet, Wang, Edom-Vovard, &  
298 Duprez, 2009; Wang et al., 2010). However, cell adhesion molecule (Hasson et al., 2010)  
299 or ECM (Kutchuk et al., 2015) can also play parallel roles. Moreover, LPM-derived cells  
300 were recently suggested to convert their cell fate to the myogenic lineage at the tip of

301 muscles and to regulate muscle patterning (de Lima et al., 2020). Clearly more studies are  
302 required to fully understand the molecular and cellular mechanisms of precise skeletal  
303 muscle patterning. We believe that revealing the molecular mechanism behind this  
304 process would shed light on broad areas of biology, such as the diversity of muscle  
305 patterning among species or regenerative medicine.

306

307

308 **Acknowledgements**

309 We thank Drs. Scherer, Kist and Ohteki (TMDU) for providing the *Sox9 flox* and  
310 *Rosa26-LSL-DTA* mice. This Research is supported by AMED-CREST from AMED  
311 (JP20gm0810008), MEXT KAKENHI (19K06697), the Nakatomi Foundation, the  
312 Nakajima Foundation and the Takeda Science Foundation for M.I.

313

314

315 **Author Contributions**

316 Y.O., T.S., C. S., and M.I. performed the experiments. H.A. and M.I. planned the study  
317 and wrote the manuscript.

318

319

320 **Declaration of Interests**

321 The authors declare no conflicts of interest in association with the present study.

322

323 **Methods**

324 **Mice**

325 A *ScxCre-L* transgenic (Tg) mouse strain has been described previously (Sugimoto,  
326 Takimoto, Hiraki, & Shukunami, 2013b). A *Rosa26-LSL-DTA* mouse strain was kindly  
327 provide by Dr. Ohteki. The mouse was originally purchased from Jackson Laboratory  
328 (*B6.129P2-Gt(ROSA)26Sortm1(DTA)Lky/J*, strain#009669) by Dr. Ohteki and  
329 transferred under the permission of Jackson Lab. A *Mohawk-Venus* knock-in mouse was  
330 generated and described in our previous study (Ito et al., 2010). *Myf5Cre*  
331 (*B6.129S4-Myf5<sup>tm3(cre)Sor</sup>/J*, strain#007893) (Tallquist, Weismann, Hellström, & Soriano,  
332 2000) and *Meox2Cre* mice (*B6.129S4-Meox2<sup>tm1(cre)Sor</sup>/J*, strain#003755) (Tallquist &  
333 Soriano, 2000) were purchased from Jackson Laboratory. A Sox9-flox mouse strain was  
334 kindly provided by Dr. Scherer and Dr. Kist (Kist, Schrewe, Balling, & Scherer, 2002).  
335 ICR mice were purchased from Sankyo lab-service (Tokyo, Japan). All animal  
336 experiments were approved by the animal experiment committees of Meiji University  
337 (approval No. IACUC17-0007) and the National Research Institute for Child Health and  
338 Development (approval No. A2004-003).

339

#### 340 **Histological analyses**

341 For paraffin sections, embryos were fixed with 4% paraformaldehyde (PFA) for 4°C  
342 overnight, dehydrated with methanol, cleared with xylene and embedded in paraffin  
343 For cryosection, embryos were fixed with 4% PFA for 4°C overnight, washed with PBS  
344 and embedded with OCT compound (Sakura Finetek, Osaka, Japan). The embryos were  
345 sectioned at 7 µm for hematoxylin and eosin (H&E) staining, and TUNEL and  
346 immunofluorescence analyses. The TUNEL analysis was performed using an In situ  
347 Death Detection Kit (Roche, Basel, Switzerland) according to the manufacturer's  
348 instruction. The names of muscles and tendons appeared in sections were judged  
349 according to Watson et al. (Watson, Riordan, Pryce, & Schweitzer, 2009).

350

#### 351 **Immunohistochemistry**

352 The embryos were fixed with 4% PFA at 4°C overnight, dehydrated with methanol and  
353 rehydrated with PBS supplemented with 0.1% triton-X100 (PBSTx). The embryos were  
354 digested with 10 µg/ml Protease K at 37°C for 60 min, re-fixed with 4% PFA, blocked



355 with 2% BSA/PBSTx and incubated with  $\alpha$ -MHC antibody (Sigma-Aldrich, St. Louis,  
356 USA, My-32, 1:1000 in 2% BSA/PBSTx) at 4°C overnight. Then the embryos were  
357 washed 10 times with PBSTx, incubated with  $\alpha$ -mouse IgG-AP conjugated (1:2000 in  
358 2% BSA/PBSTx) (ab5880 Abcam, Cambridge, UK) at 4°C overnight, washed 10 times  
359 with PBSTx and the signal was developed in NBT/BCIP solution (Roche).

360

### 361 **Immunofluorescence**

362 Paraffin or cryosections were prepared as described in the histology section, boiled in  
363 citric acid (pH 2.0) for antigen retrieval and stained with an  $\alpha$ -MHC antibody (Sigma  
364 My-32, 1:1000) or  $\alpha$ -GFP antibody (Abcam ab13970, 1:1000).  $\alpha$ -mouse IgG-Cy3  
365 (Jackson ImmunoResearch, West Grove, USA, 1:1000) or  $\alpha$ -chicken IgG-Alexa488  
366 (Thermo Fisher, Waltham, USA, 1:1000) were used as secondary antibodies.

367

### 368 **Whole mount *in situ* hybridization**

369 Whole mount *in situ* hybridization (WISH) was performed according to the methods of  
370 Yokoyama et al. (Yokoyama et al., 2009). Briefly, the embryos were fixed with 4% PFA

371 at 4°C overnight, dehydrated with methanol and rehydrated with PBS supplemented  
372 with 0.1% tween20 (PBST). The embryos were digested with 10 µg/ml Protease K at  
373 37°C for 20-60 min (depending on the stage), re-fixed with 4% PFA, and hybridized  
374 with an anti-sense probe labeled with digoxigenin (DIG) or fluorescein in hybridization  
375 buffer at 65°C overnight. The embryos were washed with wash buffer at 65°C, blocked  
376 with 10% FBS/PBST for 2 hours, and incubated with  $\alpha$ -DIG or  $\alpha$ -fluorescein antibody  
377 conjugated with alkaline phosphatase (Roche, 1:2000 in 10% FBS/PBST) at 4°C  
378 overnight. Then the embryos were washed 10 times with PBST and the signal was  
379 developed in NBT/BCIP solution (Roche). For double *in situ* hybridization,  
380 DIG-labeled *tnmd* probe and fluorescein-labeled *myh3* probe were simultaneously  
381 hybridized. *Tnmd* was stained with  $\alpha$ -DIG-AP antibody and NBT/BCIP substrate,  
382 post-fixed with 4% PFA, dehydrated with methanol, rehydrated with PBST and *myh3*  
383 was stained with  $\alpha$ -fluorescein-AP antibody and INT (Roche)/BCIP (Roche) substrates.  
384 The sequences of the primers used for the amplification of probe are as follows:  
385 *myogenin* fw: 5'- ACCTGATGGAGCTGTATGAGACATC -3', *myogenin* rev: 5'-  
386 CATTAGGTGACACTATAGCAGATGTGCACACTTGTCCAGG -3', *myh3* fw: 5'-

387 CGTTTTGGACATTGCGGGTT -3', *myh3* rev: 5'- ATGGACTCCCTCCTCTGCAT

388 -3'.

389

### 390 **Skeletal preparation**

391 The embryos were removed with their skin and internal organs, fixed with 100%

392 ethanol, and serially stained with 0.03% alcian blue (Sigma-Aldrich) solution and

393 0.01% alizarin red (Sigma-Aldrich) solution. When embryos were used after

394 whole-mount IHC, the embryos were post-fixed with 4% PFA, dehydrated with ethanol

395 and stained as described above.

396

397 **References**

- 398 Asahara, H., Inui, M., & Lotz, M. K. (2017). Tendons and Ligaments: Connecting  
399 Developmental Biology to Musculoskeletal Disease Pathogenesis. *Journal of Bone*  
400 *and Mineral Research : the Official Journal of the American Society for Bone and*  
401 *Mineral Research*, 6(2), 181–10. <http://doi.org/10.1002/jbmr.3199>
- 402 Besse, L., Sheeba, C. J., Holt, M., Labuhn, M., Wilde, S., Feneck, E., et al. (2020).  
403 Individual Limb Muscle Bundles Are Formed through Progressive Steps  
404 Orchestrated by Adjacent Connective Tissue Cells during Primary Myogenesis.  
405 *CellReports*, 30(10), 3552–3565.e6. <http://doi.org/10.1016/j.celrep.2020.02.037>
- 406 Blitz, E., Sharir, A., Akiyama, H., & Zelzer, E. (2013). Tendon-bone attachment unit is  
407 formed modularly by a distinct pool of Scx- and Sox9-positive progenitors.  
408 *Development (Cambridge, England)*, 140(13), 2680–2690.  
409 <http://doi.org/10.1242/dev.093906>
- 410 Braun, T., Rudnicki, M. A., Arnold, H. H., & Jaenisch, R. (1992). Targeted inactivation  
411 of the muscle regulatory gene Myf-5 results in abnormal rib development and  
412 perinatal death. *Cell*, 71(3), 369–382.
- 413 Brent, A. E., Braun, T., & Tabin, C. J. (2005). Genetic analysis of interactions between  
414 the somitic muscle, cartilage and tendon cell lineages during mouse development.  
415 *Development (Cambridge, England)*, 132(3), 515–528.  
416 <http://doi.org/10.1242/dev.01605>
- 417 Buckingham, M., & Rigby, P. W. J. (2014). Gene regulatory networks and  
418 transcriptional mechanisms that control myogenesis. *Developmental Cell*, 28(3),  
419 225–238. <http://doi.org/10.1016/j.devcel.2013.12.020>
- 420 Buckingham, M., Bajard, L., Chang, T., Daubas, P., Hadchouel, J., Meilhac, S., et al.  
421 (2003). The formation of skeletal muscle: from somite to limb. *Journal of Anatomy*,  
422 202(1), 59–68.
- 423 Comai, G., & Tajbakhsh, S. (2014). Molecular and cellular regulation of skeletal  
424 myogenesis. *Current Topics in Developmental Biology*, 110, 1–73.  
425 <http://doi.org/10.1016/B978-0-12-405943-6.00001-4>
- 426 Comai, G., Sambasivan, R., Gopalakrishnan, S., & Tajbakhsh, S. (2014). Variations in  
427 the efficiency of lineage marking and ablation confound distinctions between  
428 myogenic cell populations. *Developmental Cell*, 31(5), 654–667.

- 429 <http://doi.org/10.1016/j.devcel.2014.11.005>
- 430 Comai, G., Tesarova, M., Dupé, V., Rhinn, M., Vallecillo-García, P., da Silva, F., et al.  
431 (2020). Local retinoic acid directs emergence of the extraocular muscle functional  
432 unit. *bioRxiv*, 107(Pt 3), 126–48. <http://doi.org/10.1101/2020.01.07.897694>
- 433 de Lima, J. E., Blavet, C., Bonnin, M.-A., Hirsinger, E., Comai, G., Yvernogeu, L., et  
434 al. (2020). BMP signalling directs a fibroblast-to-myoblast conversion at the  
435 connective tissue/muscle interface to pattern limb muscles. *bioRxiv*, 41,  
436 2020.07.20.211342. <http://doi.org/10.1101/2020.07.20.211342>
- 437 Dietrich, S., Abou-Rebyeh, F., Brohmann, H., Bladt, F., Sonnenberg-Riethmacher, E.,  
438 Yamaai, T., et al. (1999). The role of SF/HGF and c-Met in the development of  
439 skeletal muscle. *Development (Cambridge, England)*, 126(8), 1621–1629.
- 440 Eloy-Trinquet, S., Wang, H., Edom-Vovard, F., & Duprez, D. (2009). Fgf signaling  
441 components are associated with muscles and tendons during limb development.  
442 *Developmental Dynamics*, 238(5), 1195–1206. <http://doi.org/10.1002/dvdy.21946>
- 443 Griffin, C. A., Apponi, L. H., Long, K. K., & Pavlath, G. K. (2010). Chemokine  
444 expression and control of muscle cell migration during myogenesis. *Journal of Cell*  
445 *Science*, 123(Pt 18), 3052–3060. <http://doi.org/10.1242/jcs.066241>
- 446 Gu, J.-M., Wang, D. J., Peterson, J. M., Shintaku, J., Liyanarachchi, S., Coppola, V., et  
447 al. (2016). An NF-κB - EphrinA5-Dependent Communication between NG2(+)  
448 Interstitial Cells and Myoblasts Promotes Muscle Growth in Neonates.  
449 *Developmental Cell*, 36(2), 215–224. <http://doi.org/10.1016/j.devcel.2015.12.018>
- 450 Guerquin, M.-J., Charvet, B., Nourissat, G., Havis, E., Ronsin, O., Bonnin, M.-A., et al.  
451 (2013). Transcription factor EGR1 directs tendon differentiation and promotes  
452 tendon repair. *Journal of Clinical Investigation*, 123(8), 3564–3576.  
453 <http://doi.org/10.1172/JCI67521>
- 454 Guha, U., Gomes, W. A., Kobayashi, T., Pestell, R. G., & Kessler, J. A. (2002). In vivo  
455 evidence that BMP signaling is necessary for apoptosis in the mouse limb.  
456 *Developmental Biology*, 249(1), 108–120. <http://doi.org/10.1006/dbio.2002.0752>
- 457 Hasson, P., DeLaurier, A., Bennett, M., Grigorieva, E., Naiche, L. A., Papaioannou, V.  
458 E., et al. (2010). Tbx4 and Tbx5 Acting in Connective Tissue Are Required for  
459 Limb Muscle and Tendon Patterning. *Devcel*, 18(1), 148–156.  
460 <http://doi.org/10.1016/j.devcel.2009.11.013>
- 461 Helmbacher, F., & Stricker, S. (2020). Tissue cross talks governing limb muscle

- 462 development and regeneration. *Seminars in Cell & Developmental Biology*, 104,  
463 14–30. <http://doi.org/10.1016/j.semcdb.2020.05.005>
- 464 Huang, A. H., Riordan, T. J., Pryce, B., Weibel, J. L., Watson, S. S., Long, F., et al.  
465 (2015). Musculoskeletal integration at the wrist underlies the modular development  
466 of limb tendons. *Development (Cambridge, England)*, 142(14), 2431–2441.  
467 <http://doi.org/10.1242/dev.122374>
- 468 Huang, A. H., Riordan, T. J., Wang, L., Eyal, S., Zelzer, E., Brigande, J. V., &  
469 Schweitzer, R. (2013). Repositioning forelimb superficialis muscles: tendon  
470 attachment and muscle activity enable active relocation of functional myofibers.  
471 *Developmental Cell*, 26(5), 544–551. <http://doi.org/10.1016/j.devcel.2013.08.007>
- 472 Huang, A. H., Watson, S. S., Wang, L., Baker, B. M., Akiyama, H., Brigande, J. V., &  
473 Schweitzer, R. (2019). Requirement for scleraxis in the recruitment of  
474 mesenchymal progenitors during embryonic tendon elongation. *Development*  
475 *(Cambridge, England)*, 146(20). <http://doi.org/10.1242/dev.182782>
- 476 Ito, Y., Toriuchi, N., Yoshitaka, T., Ueno-Kudoh, H., Sato, T., Yokoyama, S., et al.  
477 (2010). The Mohawk homeobox gene is a critical regulator of tendon differentiation.  
478 *Proceedings of the National Academy of Sciences*, 107(23), 10538–10542.  
479 <http://doi.org/10.1073/pnas.1000525107/-/DCSupplemental/pnas.201000525SI.pdf>
- 480 Kague, E., Hughes, S. M., Lawrence, E. A., Cross, S., Martin-Silverstone, E.,  
481 Hammond, C. L., & Hinitz, Y. (2019). Scleraxis genes are required for normal  
482 musculoskeletal development and for rib growth and mineralization in zebrafish.  
483 *The FASEB Journal : Official Publication of the Federation of American Societies*  
484 *for Experimental Biology*, 33(8), 9116–9130.  
485 <http://doi.org/10.1096/fj.201802654RR>
- 486 Kardon, G. (1998). Muscle and tendon morphogenesis in the avian hind limb.  
487 *Development (Cambridge, England)*, 125(20), 4019–4032.
- 488 Kardon, G. (2011). Development of the musculoskeletal system: meeting the neighbors.  
489 *Development (Cambridge, England)*, 138(14), 2855–2859.  
490 <http://doi.org/10.1242/dev.067181>
- 491 Kardon, G., Harfe, B. D., & Tabin, C. J. (2003). A Tcf4-positive mesodermal  
492 population provides a prepattern for vertebrate limb muscle patterning. *Devcel*, 5(6),  
493 937–944. [http://doi.org/10.1016/s1534-5807\(03\)00360-5](http://doi.org/10.1016/s1534-5807(03)00360-5)
- 494 Kist, R., Schrewe, H., Balling, R., & Scherer, G. (2002). Conditional inactivation of

- 495 Sox9: a mouse model for campomelic dysplasia. *Genesis (New York, NY : 2000)*,  
496 32(2), 121–123. <http://doi.org/10.1002/gene.10050>
- 497 Kozhemyakina, E., Lassar, A. B., & Zelzer, E. (2015). A pathway to bone: signaling  
498 molecules and transcription factors involved in chondrocyte development and  
499 maturation. *Development (Cambridge, England)*, 142(5), 817–831.  
500 <http://doi.org/10.1242/dev.105536>
- 501 Kutchuk, L., Laitala, A., Soueid-Bomgarten, S., Shentzer, P., Rosendahl, A. H., Eilott, S.,  
502 et al. (2015). Muscle composition is regulated by a Lox-TGF $\beta$  feedback loop.  
503 *Development (Cambridge, England)*, 142(5), 983–993.  
504 <http://doi.org/10.1242/dev.113449>
- 505 Li, Y., Qiu, Q., Watson, S. S., Schweitzer, R., & Johnson, R. L. (2010). Uncoupling  
506 skeletal and connective tissue patterning: conditional deletion in cartilage  
507 progenitors reveals cell-autonomous requirements for Lmx1b in dorsal-ventral limb  
508 patterning. *Development (Cambridge, England)*, 137(7), 1181–1188.  
509 <http://doi.org/10.1242/dev.045237>
- 510 Murchison, N. D., Price, B. A., Conner, D. A., Keene, D. R., Olson, E. N., Tabin, C. J.,  
511 & Schweitzer, R. (2007). Regulation of tendon differentiation by scleraxis  
512 distinguishes force-transmitting tendons from muscle-anchoring tendons.  
513 *Development (Cambridge, England)*, 134(14), 2697–2708.  
514 <http://doi.org/10.1242/dev.001933>
- 515 Pryce, B. A., Watson, S. S., Murchison, N. D., Staverosky, J. A., Dunker, N., &  
516 Schweitzer, R. (2009). Recruitment and maintenance of tendon progenitors by  
517 TGF $\beta$  signaling are essential for tendon formation. *Development (Cambridge,*  
518 *England)*, 136(8), 1351–1361. <http://doi.org/10.1242/dev.027342>
- 519 Rodriguez-Guzman, M., Montero, J. A., Santesteban, E., Gañan, Y., Macias, D., &  
520 Hurle, J. M. (2007a). Tendon-muscle crosstalk controls muscle bellies  
521 morphogenesis, which is mediated by cell death and retinoic acid signaling.  
522 *Developmental Biology*, 302(1), 267–280.  
523 <http://doi.org/10.1016/j.ydbio.2006.09.034>
- 524 Rodriguez-Guzman, M., Montero, J. A., Santesteban, E., Gañan, Y., Macias, D., &  
525 Hurle, J. M. (2007b). Tendon-muscle crosstalk controls muscle bellies  
526 morphogenesis, which is mediated by cell death and retinoic acid signaling.  
527 *Developmental Biology*, 302(1), 267–280.

- 528 <http://doi.org/10.1016/j.ydbio.2006.09.034>
- 529 Schweitzer, R., Zelzer, E., & Volk, T. (2010). Connecting muscles to tendons: tendons  
530 and musculoskeletal development in flies and vertebrates. *Development (Cambridge,*  
531 *England)*, 137(17), 2807–2817. <http://doi.org/10.1242/dev.047498>
- 532 Shukunami, C., Oshima, Y., & Hiraki, Y. (2001). Molecular cloning of tenomodulin, a  
533 novel chondromodulin-I related gene. *Biochemical and Biophysical Research*  
534 *Communications*, 280(5), 1323–1327. <http://doi.org/10.1006/bbrc.2001.4271>
- 535 Shukunami, C., Takimoto, A., Nishizaki, Y., Yoshimoto, Y., Tanaka, S., Miura, S., et al.  
536 (2018). Scleraxis is a transcriptional activator that regulates the expression of  
537 Tenomodulin, a marker of mature tenocytes and ligamentocytes. *Scientific Reports*,  
538 8(1), 3155–17. <http://doi.org/10.1038/s41598-018-21194-3>
- 539 Shwartz, Y., Viukov, S., Krief, S., & Zelzer, E. (2016). Joint Development Involves a  
540 Continuous Influx of Gdf5-Positive Cells. *CellReports*, 15(12), 2577–2587.  
541 <http://doi.org/10.1016/j.celrep.2016.05.055>
- 542 Sugimoto, Y., Takimoto, A., Akiyama, H., Kist, R., Scherer, G., Nakamura, T., et al.  
543 (2013a). Scx+/Sox9+ progenitors contribute to the establishment of the junction  
544 between cartilage and tendon/ligament. *Development (Cambridge, England)*,  
545 140(11), 2280–2288. <http://doi.org/10.1242/dev.096354>
- 546 Sugimoto, Y., Takimoto, A., Hiraki, Y., & Shukunami, C. (2013b). Generation and  
547 characterization of ScxCre transgenic mice. *Genesis (New York, NY : 2000)*, 51(4),  
548 275–283. <http://doi.org/10.1002/dvg.22372>
- 549 Swinehart, I. T., Schlientz, A. J., Quintanilla, C. A., Mortlock, D. P., & Wellik, D. M.  
550 (2013). Hox11 genes are required for regional patterning and integration of muscle,  
551 tendon and bone. *Development (Cambridge, England)*, 140(22), 4574–4582.  
552 <http://doi.org/10.1242/dev.096693>
- 553 Tallquist, M. D., & Soriano, P. (2000). Epiblast-restricted Cre expression in MORE  
554 mice: a tool to distinguish embryonic vs. extra-embryonic gene function. *Genesis*  
555 *(New York, NY : 2000)*, 26(2), 113–115.
- 556 Tallquist, M. D., Weismann, K. E., Hellström, M., & Soriano, P. (2000). Early  
557 myotome specification regulates PDGFA expression and axial skeleton  
558 development. *Development (Cambridge, England)*, 127(23), 5059–5070.
- 559 Vallecillo-García, P., Orgeur, M., Hofe-Schneider, vom, S., Stumm, J., Kappert, V.,  
560 Ibrahim, D. M., et al. (2017). Odd skipped-related 1 identifies a population of



561 embryonic fibro-adipogenic progenitors regulating myogenesis during limb  
562 development. *Nature Communications*, 8(1), 1218–18.  
563 <http://doi.org/10.1038/s41467-017-01120-3>  
564 Voehringer, D., Liang, H.-E., & Locksley, R. M. (2008). Homeostasis and effector  
565 function of lymphopenia-induced “memory-like” T cells in constitutively T  
566 cell-depleted mice. *Journal of Immunology (Baltimore, Md : 1950)*, 180(7),  
567 4742–4753.  
568 Wang, H., Noulet, F., Edom-Vovard, F., Tozer, S., Le Grand, F., & Duprez, D. (2010).  
569 Bmp signaling at the tips of skeletal muscles regulates the number of fetal muscle  
570 progenitors and satellite cells during development. *Developmental Cell*, 18(4),  
571 643–654. <http://doi.org/10.1016/j.devcel.2010.02.008>  
572 Watson, S. S., Riordan, T. J., Pryce, B. A., & Schweitzer, R. (2009). Tendons and  
573 muscles of the mouse forelimb during embryonic development. *Developmental*  
574 *Dynamics*, 238(3), 693–700. <http://doi.org/10.1002/dvdy.21866>  
575 Yokoyama, S., Ito, Y., Ueno-Kudoh, H., Shimizu, H., Uchibe, K., Albin, S., et al.  
576 (2009). A systems approach reveals that the myogenesis genome network is  
577 regulated by the transcriptional repressor RP58. *Developmental Cell*, 17(6),  
578 836–848. <http://doi.org/10.1016/j.devcel.2009.10.011>  
579  
580  
581

582 **Figure legends**

583 Figure 1 **Tendon and ligament tissues are reduced in *Scx-DTA* mice.**

584 (A) A schematic drawing showing the generation of the *Scx-DTA* mouse. Illustrations  
585 are provided by ©2016 DBCLS TogoTV. (B-E) H&E staining (B, D) and the TUNEL  
586 analysis (C, E) of the E15.5 embryonic tail. The blue arrowhead indicates the normal  
587 tail tendon and the red arrowhead indicates ablated tendon tissue. Scalebar: 100  $\mu$ m.  
588 (F-M) The fluorescence signal from Mxk-Venus (MxkVen) knock-in reporter visualized  
589 the tendon tissue in E17.5 embryos. The blue arrowhead indicates normal limb tendons  
590 and the red arrowhead indicates ablated tendon tissue. Scalebar: 100  $\mu$ m. (N-U) H&E  
591 staining of E15.5 embryonic tendon/ligament tissues. Ach. tendon, Achilles' tendon;  
592 Cruc. Ligament, cruciate ligament; Intervert. Disc., intervertebral disc. Scalebar: 100  
593  $\mu$ m. (V) A table summarizing the genotypes of obtained P1 pups from crossing of  
594 *ScxCre-L Tg* and *Rosa26-LSL-DTA*. (W) The gross appearance of P0 pups. A *Scx-DTA*  
595 pup is shown on the left and a control pup is shown on the right. *Scx-DTA* pups were  
596 pale and the milk spot was not observed. (Y) Alcian-blue and alizarin-red staining  
597 showing the skeletal elements of P0 pups. An *Scx-DTA* pup is shown on the left and a

598 control pup is shown on the right. The blue arrowhead indicates the normal ribcage and  
599 the red arrowhead indicates the reduced ribcage. For all the experiments, at least three  
600 embryos were examined ( $n>3$ ) and consistent results were obtained. The figures show  
601 representative results.

602

603

604

605

606 Figure 2

607 **The muscle shape and position were altered in the *Scx-DTA* mouse.**

608 (A-H) Whole-mount immunohistochemistry of myosin heavy chain (MHC) in forelimbs  
609 of P0 pups. Del.: Deltoid muscle. The blue arrowhead in C indicates the normal  
610 insertion site of the deltoid muscle (deltoid tuberosity). The red arrowhead in G  
611 indicates an altered insertion site of the deltoid (shoulder joint). The arrows in D and H  
612 indicate the extensor pollicis muscles. The blue arrowheads in D indicate separated  
613 ECU and EDQ muscles. The red arrowhead in H indicates fused ECU/EDQ muscle.  
614 (I-O) Immunofluorescence of MHC and MxvVen (using  $\alpha$ -EGFP) in the forelimbs of an  
615 E18.5 embryo. The blue arrowhead in J' indicates FDS tendons. The red arrowhead in  
616 M' indicates distally dislocated FDS muscle. The blue arrowhead in K indicates FDS  
617 muscles that are missing in the *Scx-DTA* mouse (red arrowhead in N). The blue arrow in  
618 K indicates normal extensor carpi muscles in a control embryo. The red arrow in N  
619 indicates rearranged extensor carpi muscles in an *Scx-DTA* embryo. The photograph in  
620 O shows the position of sections I-N. Scalebar: 100  $\mu$ m. (P-S) Whole-mount  
621 immunohistochemistry of MHC in E17.5 embryos. The blue arrowhead in P' indicates

622 the normal insertion site of the pectoralis major muscle (deltoid tuberosity). The red  
623 arrowhead in R' indicates a dislocated insertion site of the pectoralis major muscle  
624 (elbow joint). The blue arrowhead in Q' indicates the normal insertion site of the gluteus  
625 maximus muscle (gluteus tuberosity). The red arrowhead in S' indicates a dislocated  
626 insertion site of the gluteus major muscle (knee joint). (T-W) Whole-mount in situ  
627 hybridization of *myh3* in the rectus abdominus (T, V, Rec. Abdomin.) and diaphragm (U,  
628 W). The blue arrowheads in T and U indicate the normal organization of abdominal  
629 muscles. The red arrowheads in V and W indicate a disorganized pattern of abdominal  
630 muscles. The arrows in U and W indicate the width of the central tendons. For all of the  
631 experiments, at least three pups/embryos were examined (n>3) and consistent results  
632 were obtained. The figures show representative results.

633

634

635 Figure 3

636 **Loss of the tendon cells affects the patterning of myofibers.**

637 (A-F) A whole-mount in situ hybridization (WISH) analysis visualized the myoblast  
638 localization. The blue arrowheads in A and D indicate the normal migration of  
639 *Pax3*-positive myoblasts into the E11.5 limb. The blue arrowheads in B and E indicate  
640 the normal segregation of *Myog*-positive myoblasts in the E12.5 limb. The blue  
641 arrowheads in C and F indicate normal positioning of *Myog*-positive myoblasts in the  
642 E13.5 limb. (G-L) A WISH analysis visualizes myofiber patterning. The blue  
643 arrowheads in G and J indicate the normal location of *Myh3*-positive myofibers in the  
644 E12.5 limb. The blue arrowheads in H and I indicate the normal boundaries of the  
645 *Myh3*-positive FDC muscle bundle in E13.5 and E14.5 limbs. The red arrowheads in K  
646 and L indicate obscure or fused boundaries of the *Myh3*-positive FDC muscle bundle in  
647 E13.5 and E14.5 limbs. (M-P) Whole-mount immunohistochemistry visualized myosin  
648 heavy chain (MHC)-positive myofibers in E14.5 embryos. The blue arrowheads in M  
649 and N indicate the normal insertion site of the deltoid muscle (deltoid tuberosity). The  
650 red arrowheads in O and P indicate a dislocated insertion site of the deltoid muscle

651 (shoulder joint). At least three embryos were examined in all the experiments ( $n>3$ ) and

652 consistent results were obtained. The figures show representative results

653

654 Figure 4

655 **The attachment site of muscle was repositioned after myofiber differentiation.**

656 (A, D) Whole-mount immunohistochemistry visualized myosin heavy chain  
657 (MHC)-positive myofibers in the hind limb of E14.5 embryos. Dotted lines indicate the  
658 position of the section shown in B, C, E, and F. Arrowheads indicate the position of the  
659 gluteus tuberosities. (B, C, E, F) The immunofluorescence analysis of the E14.5  
660 hindlimb. Arrowheads indicate the position of the gluteus tuberosities. Scalebar: 100  $\mu$ m.

661 (G, J) Whole-mount immunohistochemistry visualized myosin heavy chain  
662 (MHC)-positive myofibers in the hind limb of E17.5 embryos. Dotted lines indicate the  
663 position of the section shown in H, I, K, and L. The blue arrowhead in G indicates the  
664 normal insertion site of the gluteus maximus muscle (gluteus tuberosity). The red  
665 arrowhead in J indicates the dislocated insertion site of the gluteus maximus muscle  
666 (knee joint). (H, I, K, L) The immunofluorescence analysis of the E17.5 hindlimb.  
667 Arrowheads indicate the position of gluteus tuberosities. Scalebar: 100  $\mu$ m. In all of the  
668 experiments, at least three embryos were examined ( $n>3$ ) and consistent results were  
669 obtained. The figures show representative results

670



671 Figure S1

672 **Tendon/ligament-specific cell death was observed in the *Scx-DTA* mouse.**

673 (A-D) A TUNEL analysis of the E15.5 forelimb. (E-H) A TUNEL analysis of the E12.5  
674 forelimb and shoulder. (I-P) H&E staining and a TUNEL analysis of the E12.5 vertebrae  
675 and tail.

676

677 Figure S2

678 **The deltoid tuberosity is missing in the *Scx-DTA* mouse.**

679 (A, B) Alcian-blue and alizarin-red staining of P0 pups. The blue arrowhead indicates  
680 the normal deltoid tuberosity in a control limb (A), which is missing in the *Scx-DTA*  
681 forelimb (B, red arrowhead)

682

683 Figure S3

684 **Muscle patterning was not affected in the hindlimb of the *Scx-DTA* mouse.**

685 (A, C) Whole-mount immunohistochemistry visualized MHC-positive myofibers in the  
686 P0 hindlimb. (B, D) An immunofluorescence analysis of MHC in an E15.5 hindlimb

687 section. Scale bar: 100  $\mu$ m

688

689 Figure S4

690 **The MCT gene expression was not changed in the *Scx-DTA* mouse.**

691 Quantitative RT-PCR showed a significant reduction in the expression of tendon genes

692 in the E14.5 *Scx-DTA* forelimb; however, the expression of MCT genes was not

693 changed. Student's t-test was performed. \* $p < 0.05$ , \*\* $p < 0.01$ , n.s.: no significant

694 difference.

695

696 Figure S5

697 **The high expression of *Myh3* marks the muscle-tendon junction.**

698 A whole-mount in situ hybridization (WISH) analysis visualized the *Myh3* and *Tnmd*

699 expression in the E14.5 hindlimbs. In A and D, *Myh3* was stained with INT/BCIP

700 (orange) and *Tnmd* was stained with NBT/BCIP (blue). Arrowheads indicate the

701 putative junction between the EDL muscle and the EDL tendon.

702

703 Figure S6

704 **Skeletal malformation did not affect muscle patterning.**

705 (A, C) Whole-mount immunohistochemistry visualized MHC-positive myofibers in  
706 E16.5 pectoral muscles. The blue arrowheads indicate the normal insertion site of the  
707 pectoralis major muscles (deltoid tuberosity) in control and *Sox9* heterozygous embryos.  
708 (B, D) Alcian-blue and alizarin-red staining showing the skeletal elements of embryos  
709 shown in A and C. The blue arrowhead indicates the normal deltoid tuberosity in a  
710 control limb (B), which is missing in the *Sox9* heterozygous forelimb (D, red  
711 arrowhead). (E, G) Whole-mount immunohistochemistry visualized MHC-positive  
712 myofibers in the E16.5 pectoral muscles. The blue arrowheads indicate the normal  
713 insertion site of the pectoralis major muscles (deltoid tuberosity) in control and  
714 *Myf5<sup>Cre/Cre</sup>* embryos. (F, H) Alcian-blue and alizarin-red staining showing the skeletal  
715 elements of embryos shown in E and G. The blue arrowhead indicates a normal rib cage  
716 in a control embryo (E), which is diminished in *Myf5<sup>Cre/Cre</sup>* embryo (H, red arrowhead).  
717 (I, J) Whole-mount immunohistochemistry visualized MHC-positive myofibers in the

718 E16.5 pectoral muscles. The blue arrowheads indicate the normal insertion site of the

719 pectoralis major muscles (deltoid tuberosity) in control and *Myf5-DTA* embryos.

720

721 Figure S7

722 **Dislocation of the insertion site toward the joint region where tendon cells are**

723 **abundant.**

724 (A) The immunofluorescence analysis of MxkVen (using  $\alpha$ -EGFP) in the E17.5 femur

725 of control (upper panel) and *Scx-DTA* (lower panel) embryos. The blue arrowheads

726 indicate the proximal and distal tendons for the gluteus major muscle in the control

727 embryo, which are missing in the *Scx-DTA* embryo (red arrowhead). Yellow arrowheads

728 indicate a comparable amount of tendon tissue in the knee joint of control and *Scx-DTA*

729 embryos. (B) Whole-mount in situ hybridization of *myh3* in the E14.5 forelimb of

730 control and *Scx-DTA* embryos. The blue arrowheads indicate the normal attachment

731 sites of limb muscles. The red arrowhead indicates the accumulation of attachment sites

732 to the shoulder joint.

733

734

735

A bioRxiv preprint doi: <https://doi.org/10.1101/2021.01.03.424463>; this version posted January 4, 2021. The copyright holder for this preprint (which was not certified by peer review) is the author/funder, who has granted bioRxiv a license to display the preprint in perpetuity. It is made available under aCC-BY-NC-ND 4.0 International license.

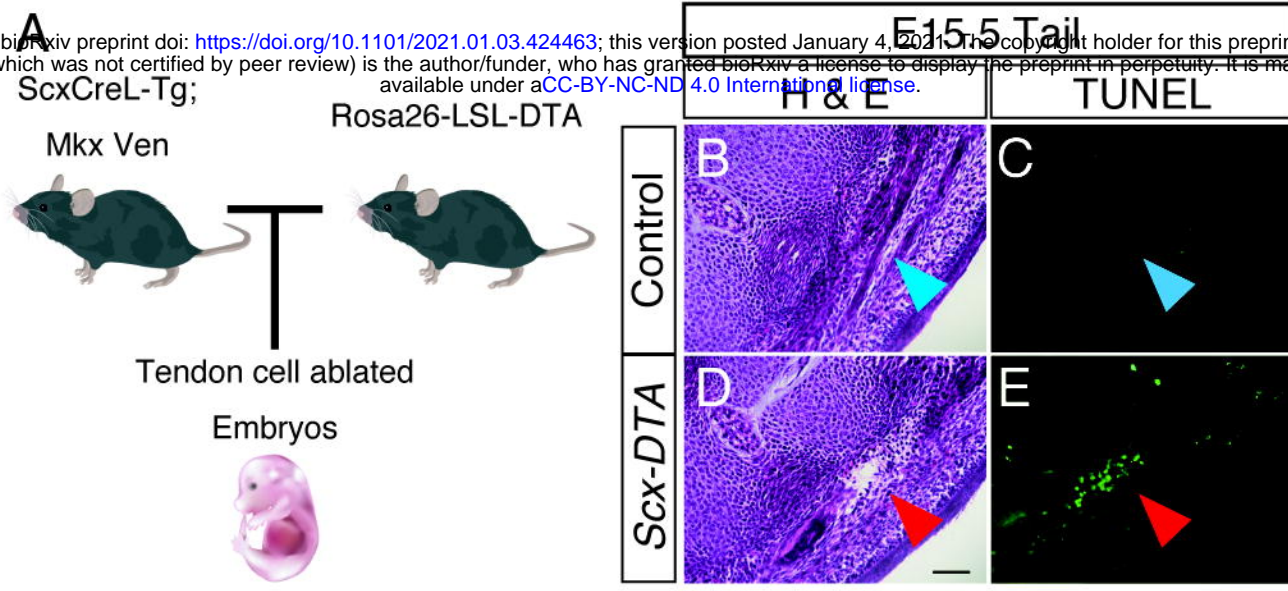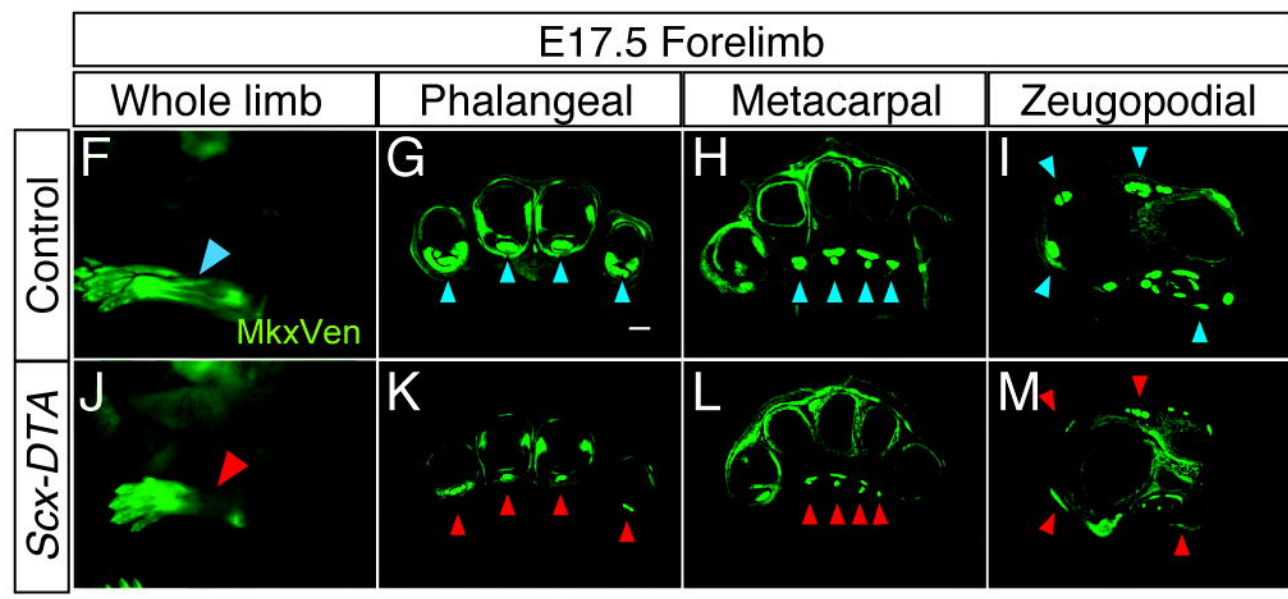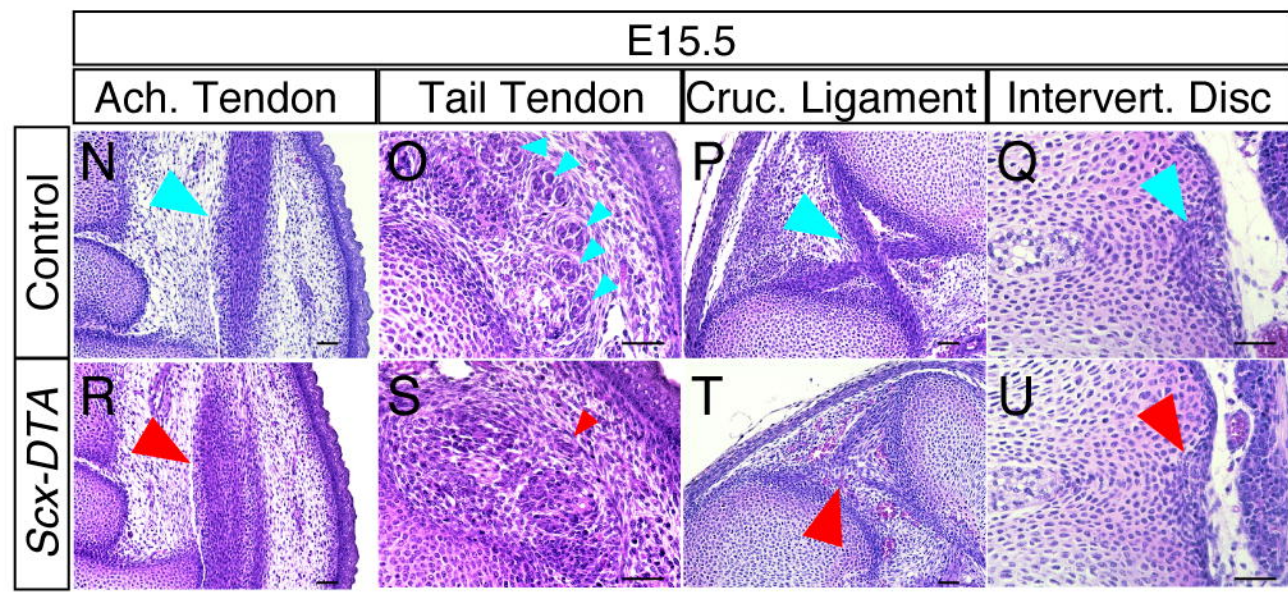

**V** Obtained P1 Pups

|            |   |
|------------|---|
| Cre-; DTA- | 2 |
| Cre+; DTA- | 5 |
| Cre-; DTA+ | 6 |
| Cre+; DTA+ | 0 |

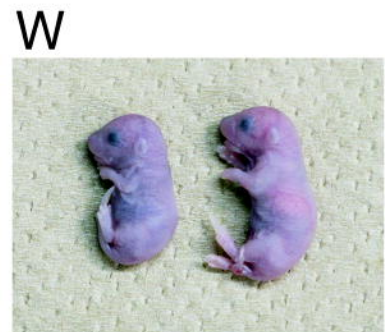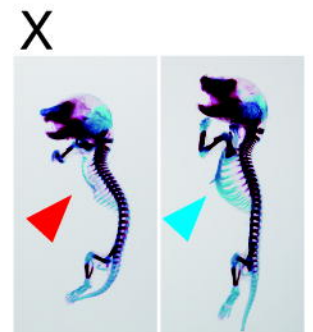

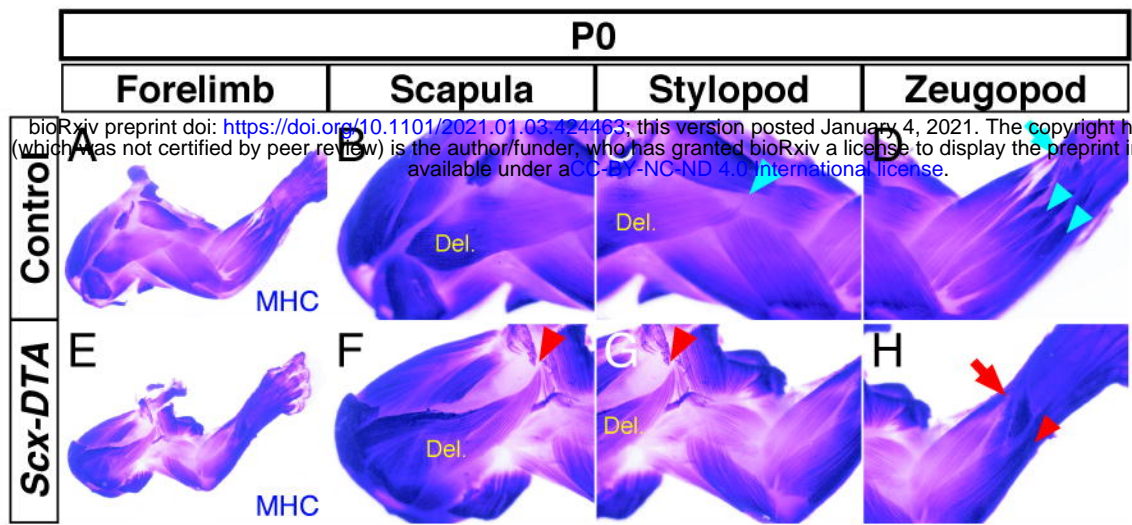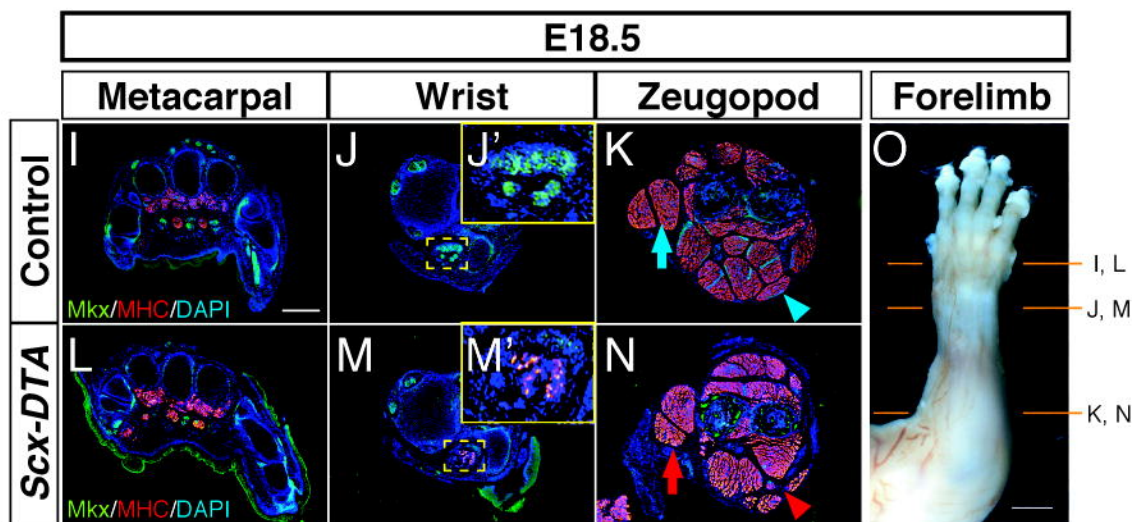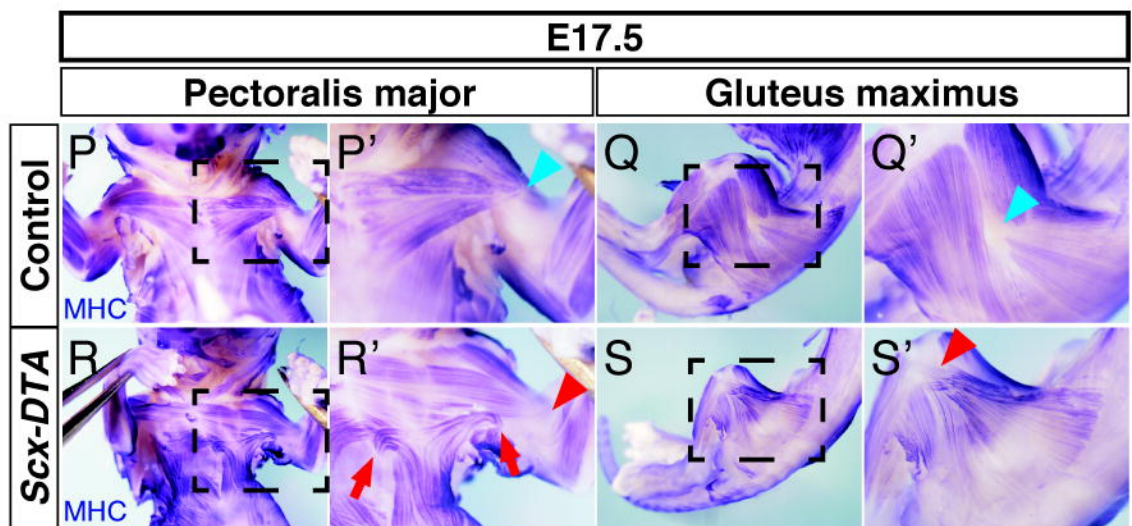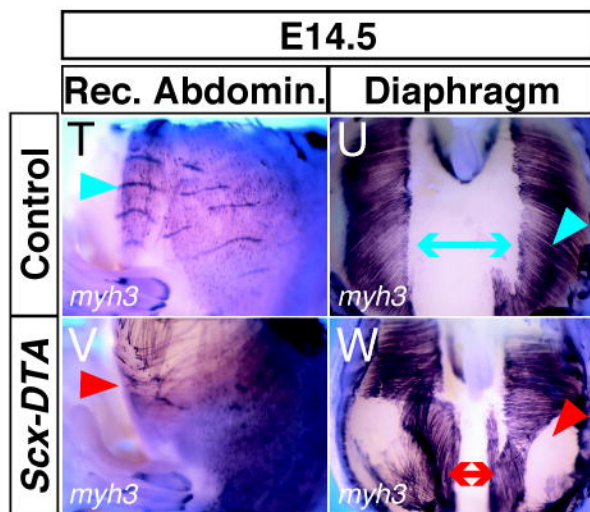



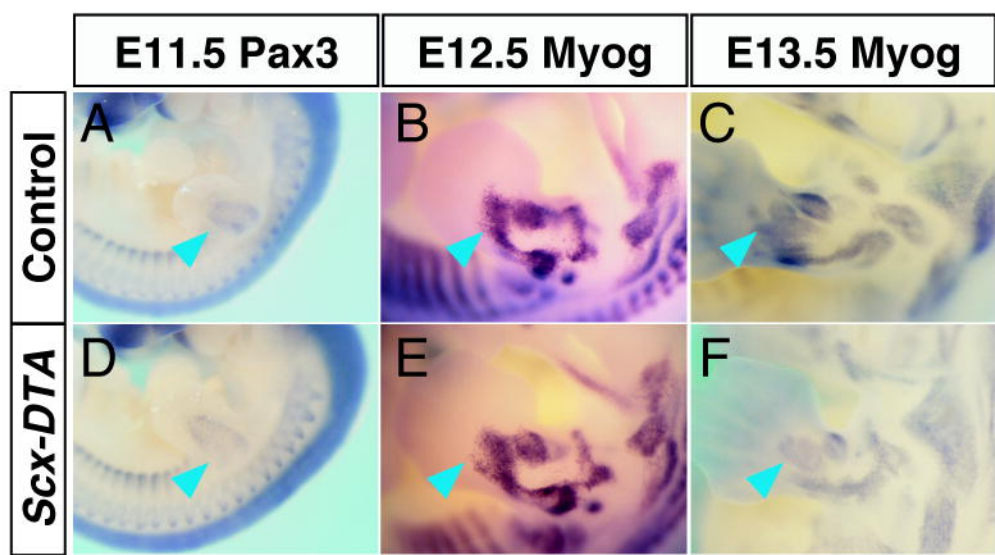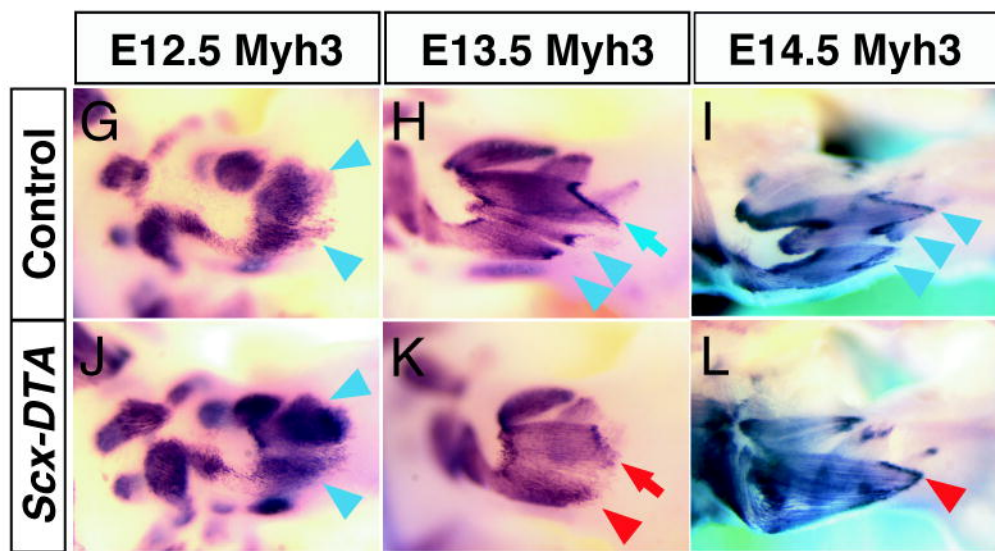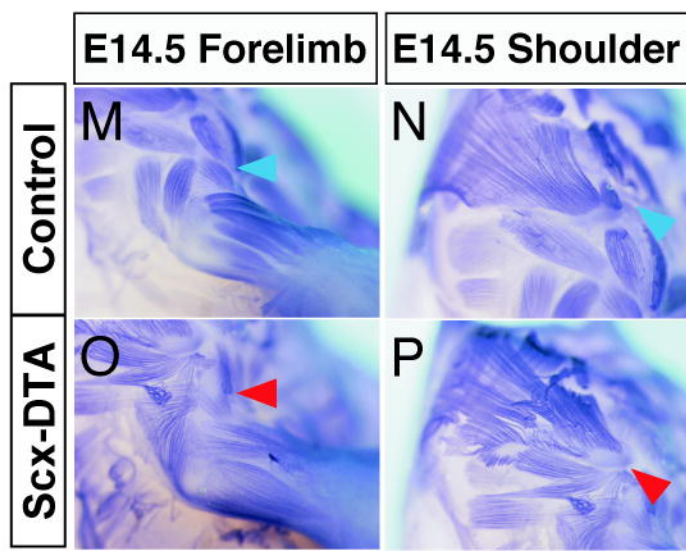

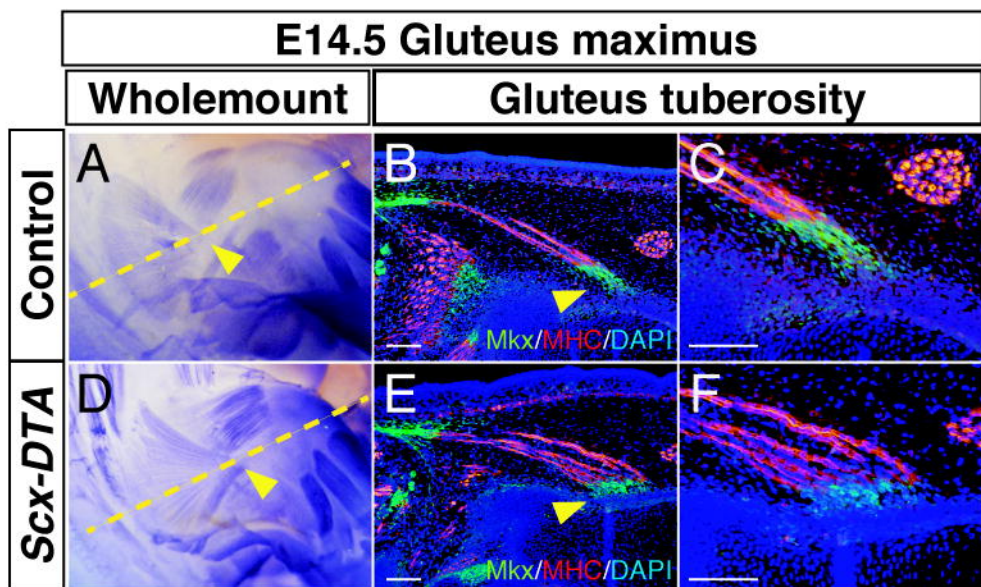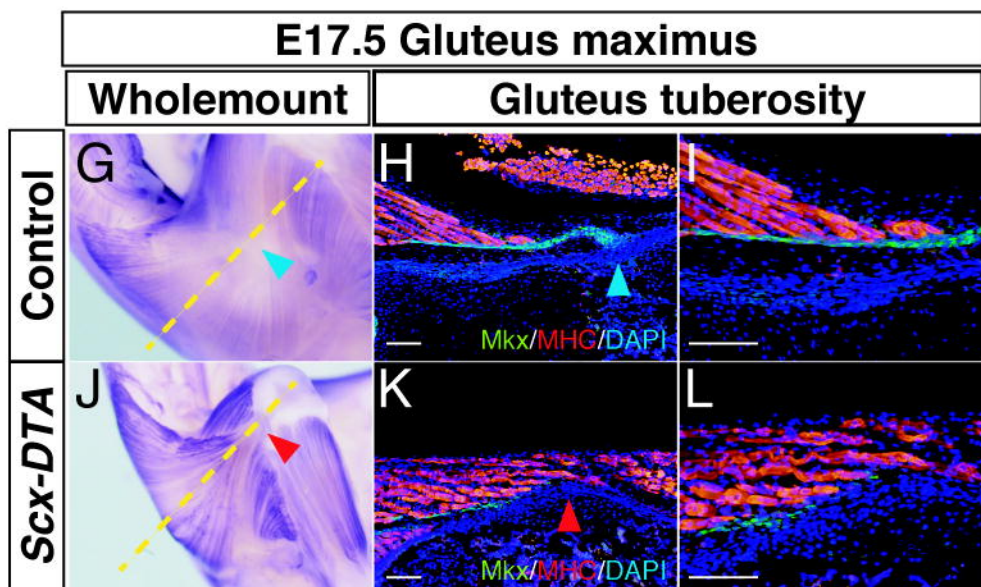

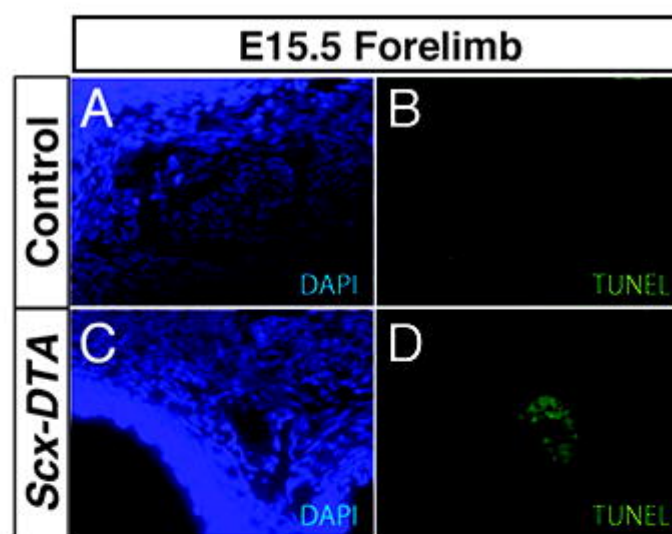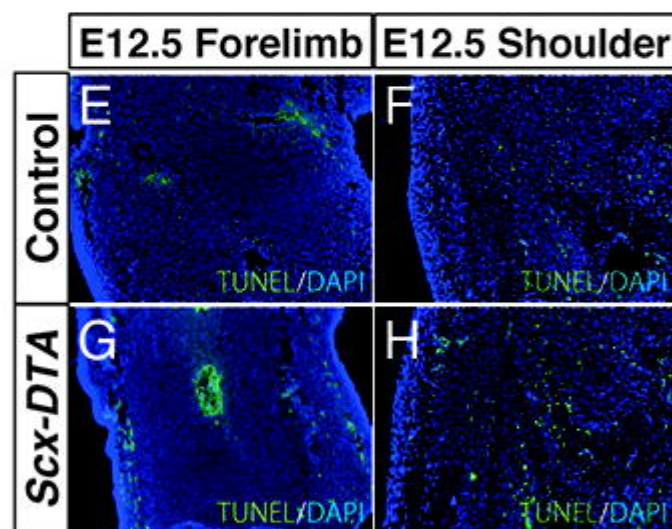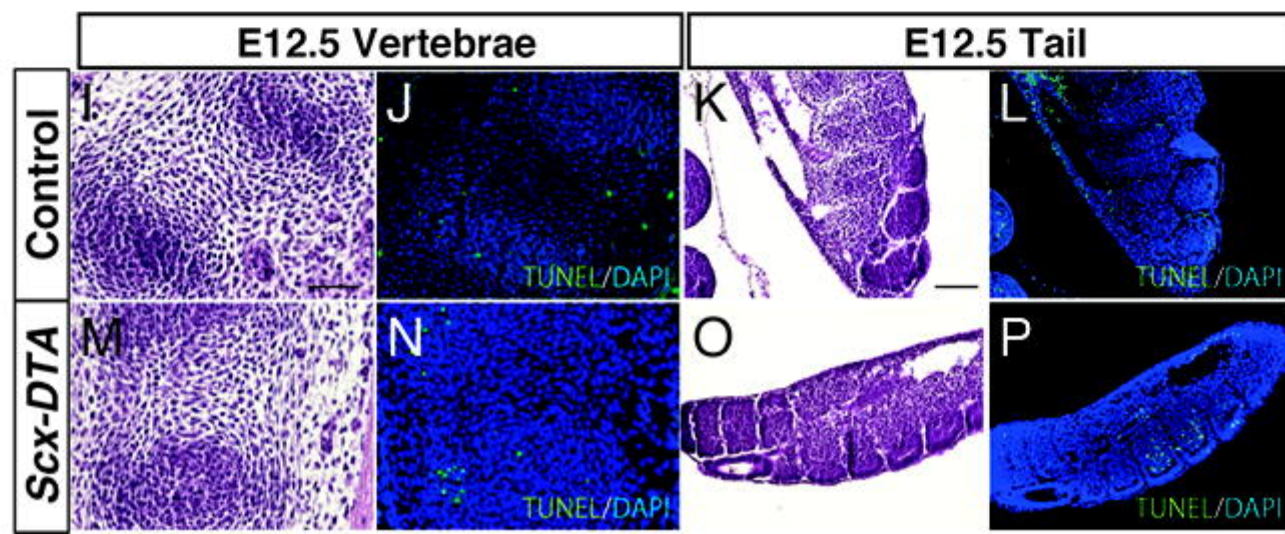

## Ono et al. Supplementary Figure 2

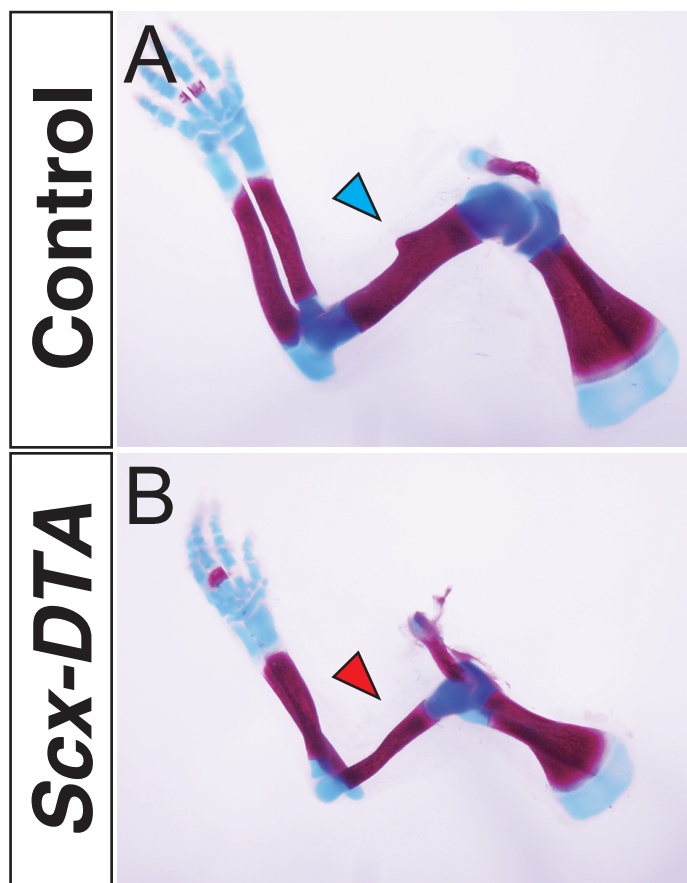

# Ono et al. Supplementary Figure 3

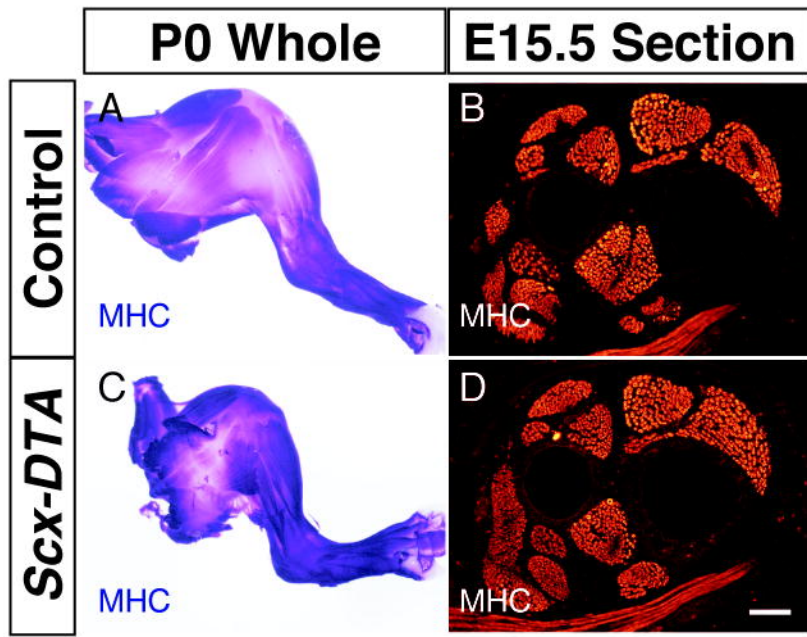

## Ono et al. Supplementary Figure 4

### Tendon and MCT gene expression

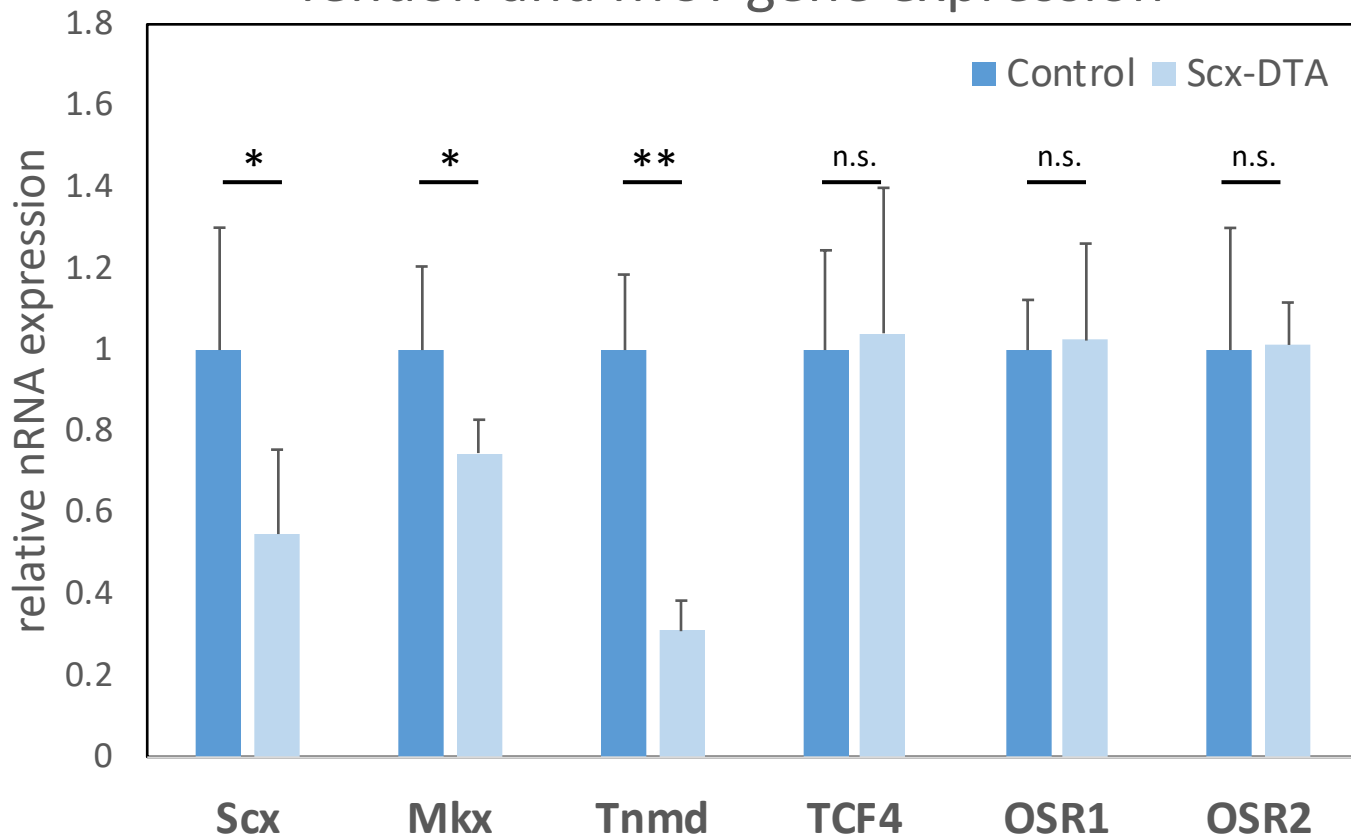

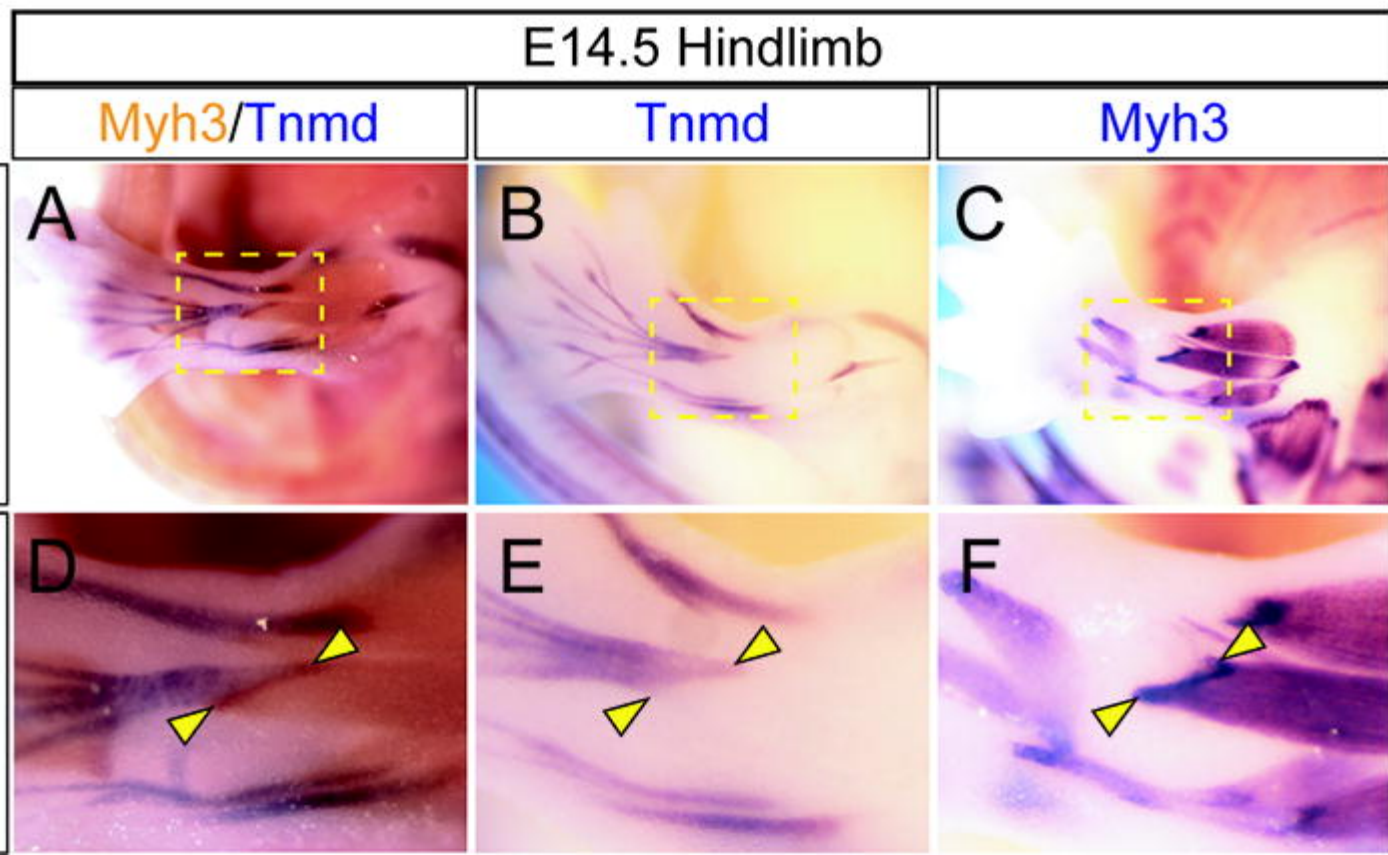

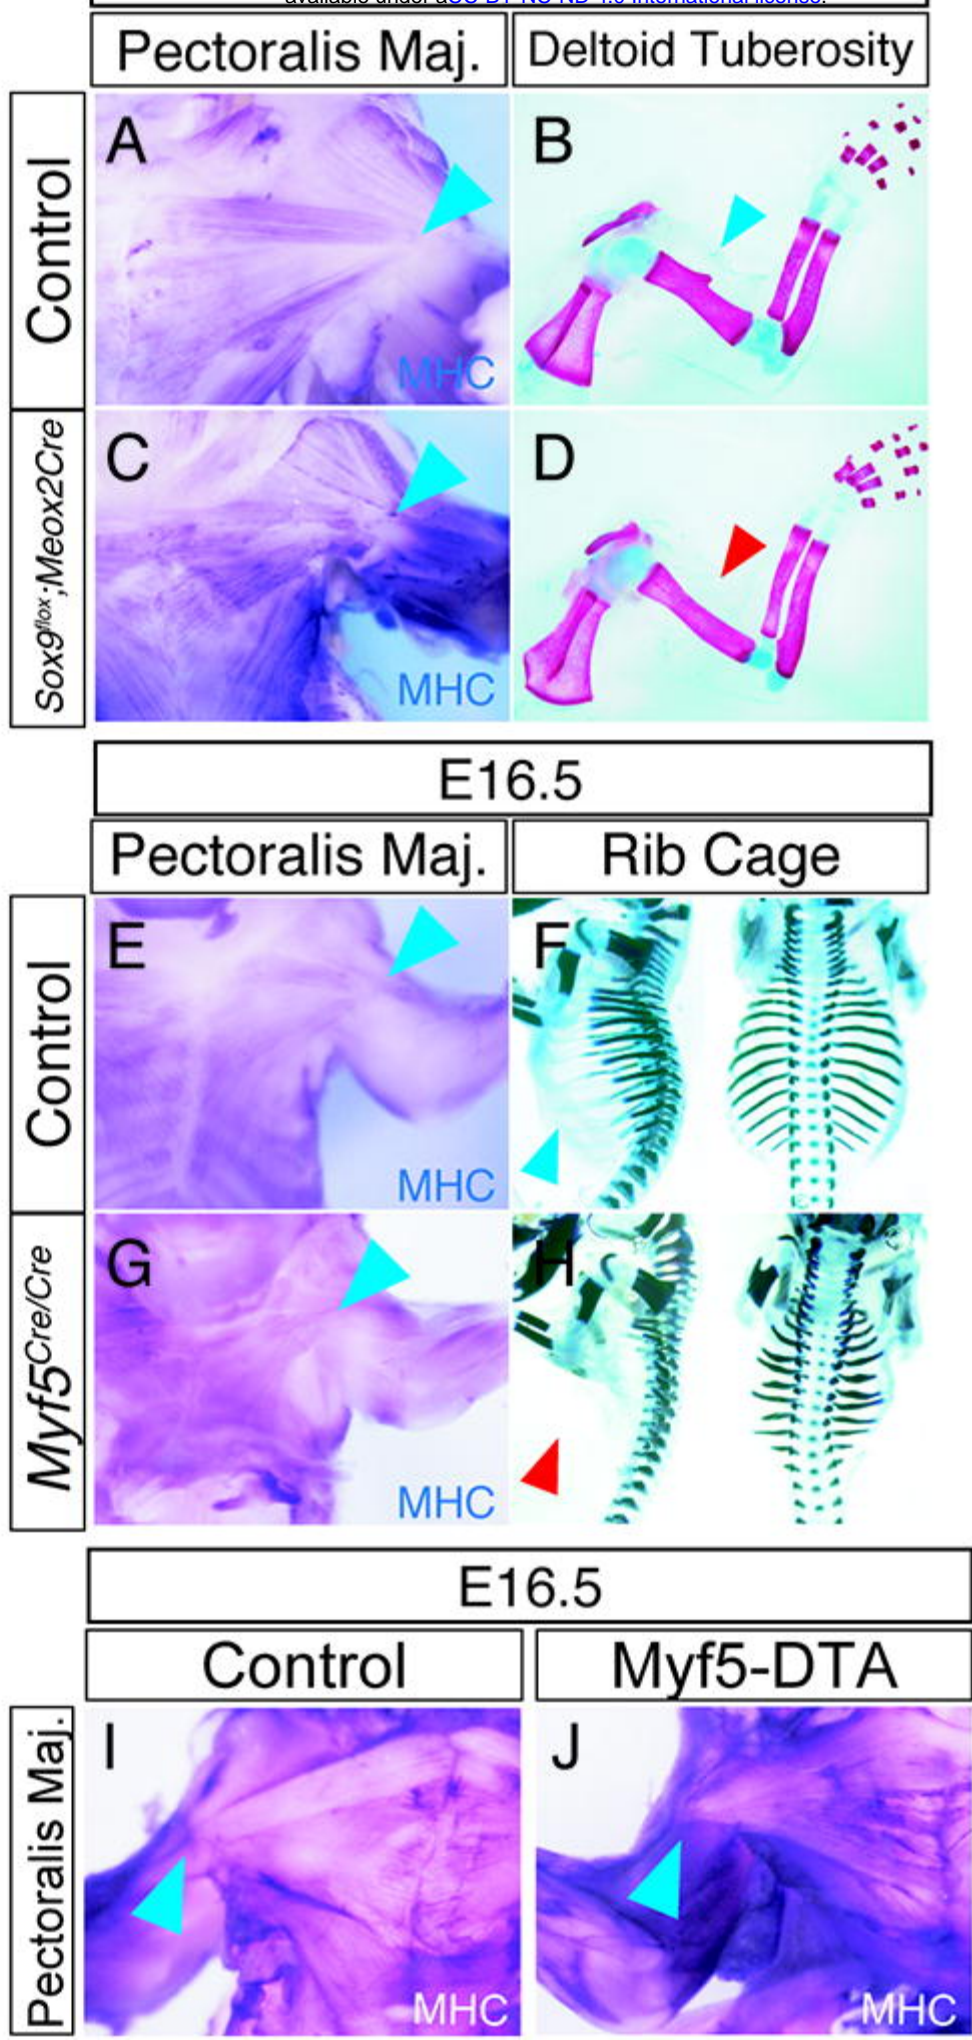



**E17.5 Hindlimb****A**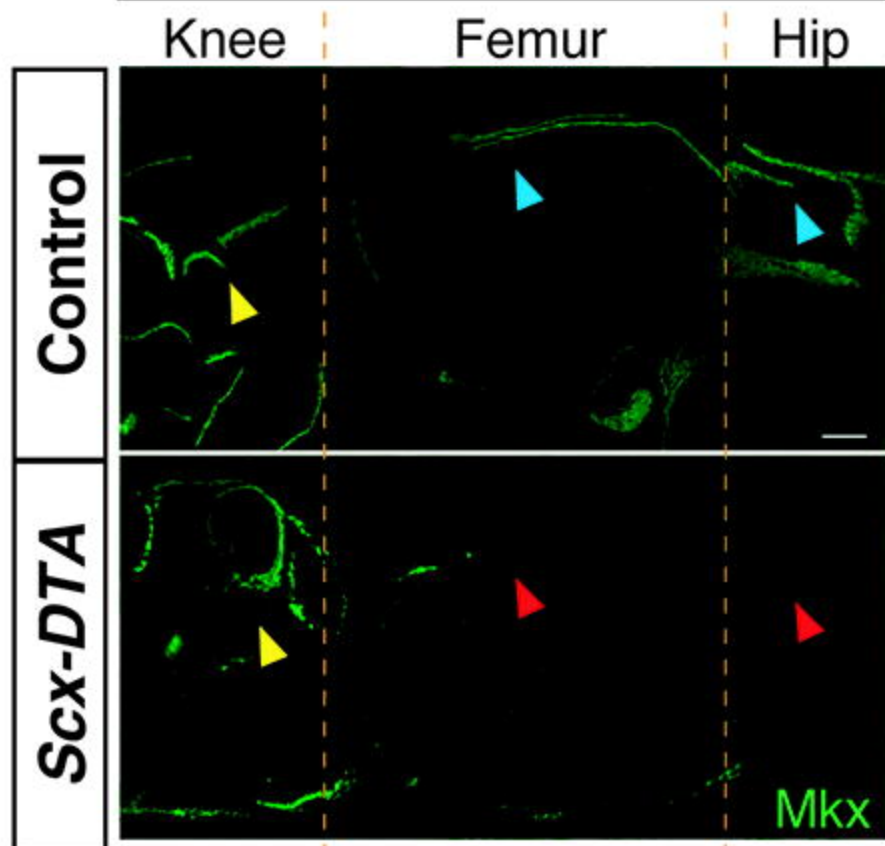**B****Control****Scx-DTA****E14.5 Forelimb**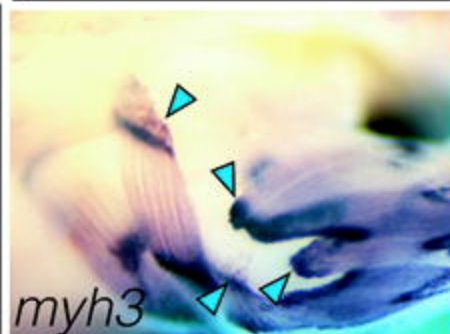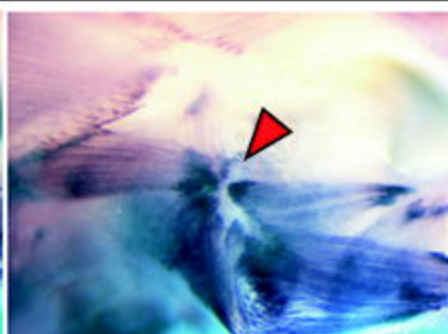

Source: https://biorxiv.org/content/10.1101/2021.01.03.424463v1.full.pdf
